# Supplementary material for: Glucocorticoid receptor-induced non-muscle caldesmon regulates metastasis in castration-resistant prostate cancer
Source: PubMed Central journal article supplement (PMC10423232; doi:10.1038/s41389-023-00485-z), 2023-08-12

Fig. 1A raw data for Western blot using anti-I-CaD antibody

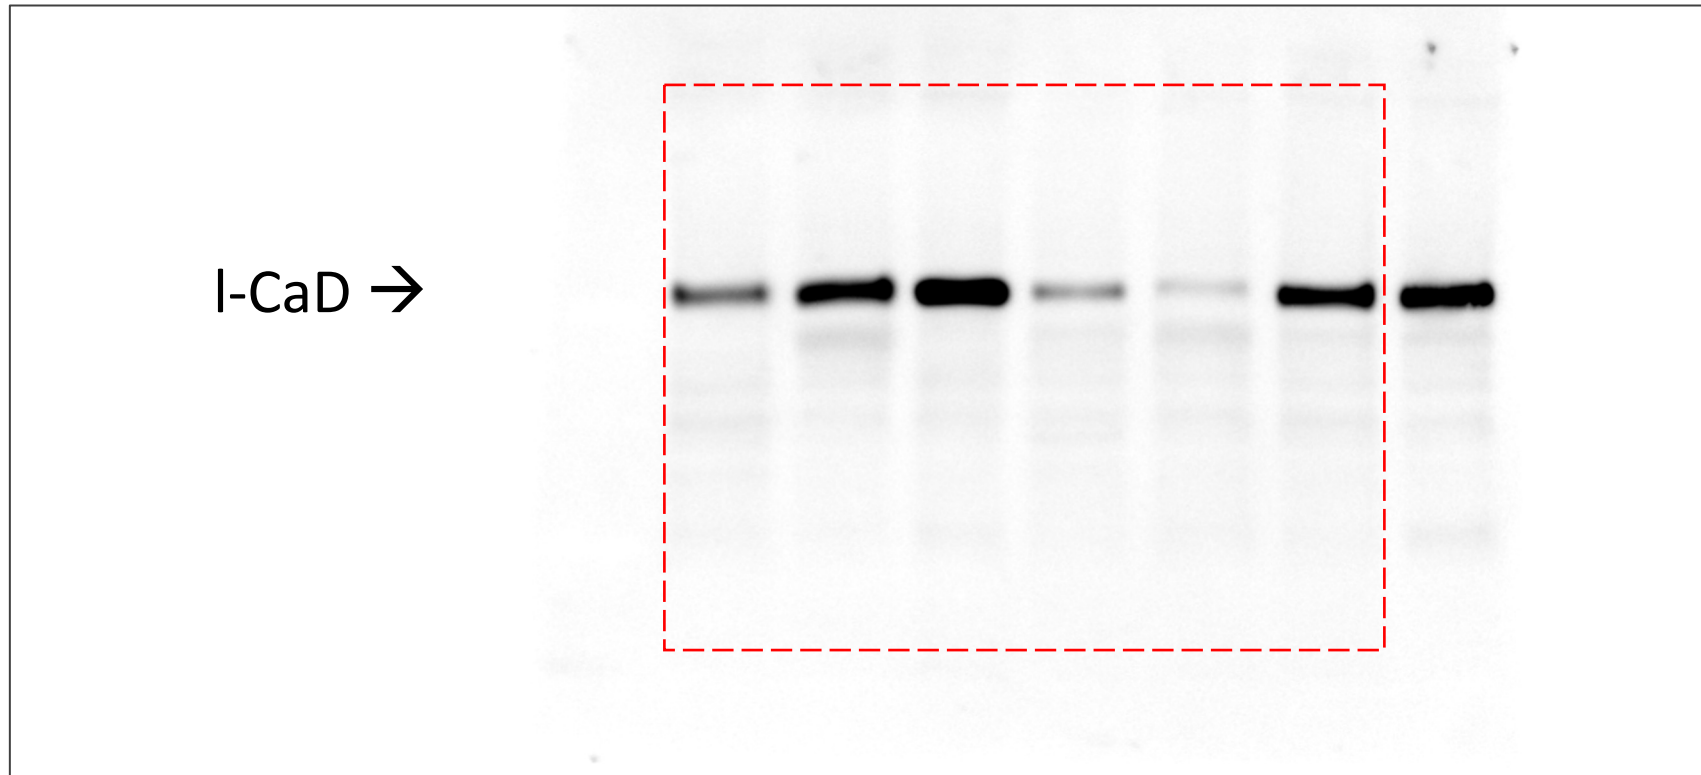

Fig. 1A raw data for Western blot using anti-actin antibody

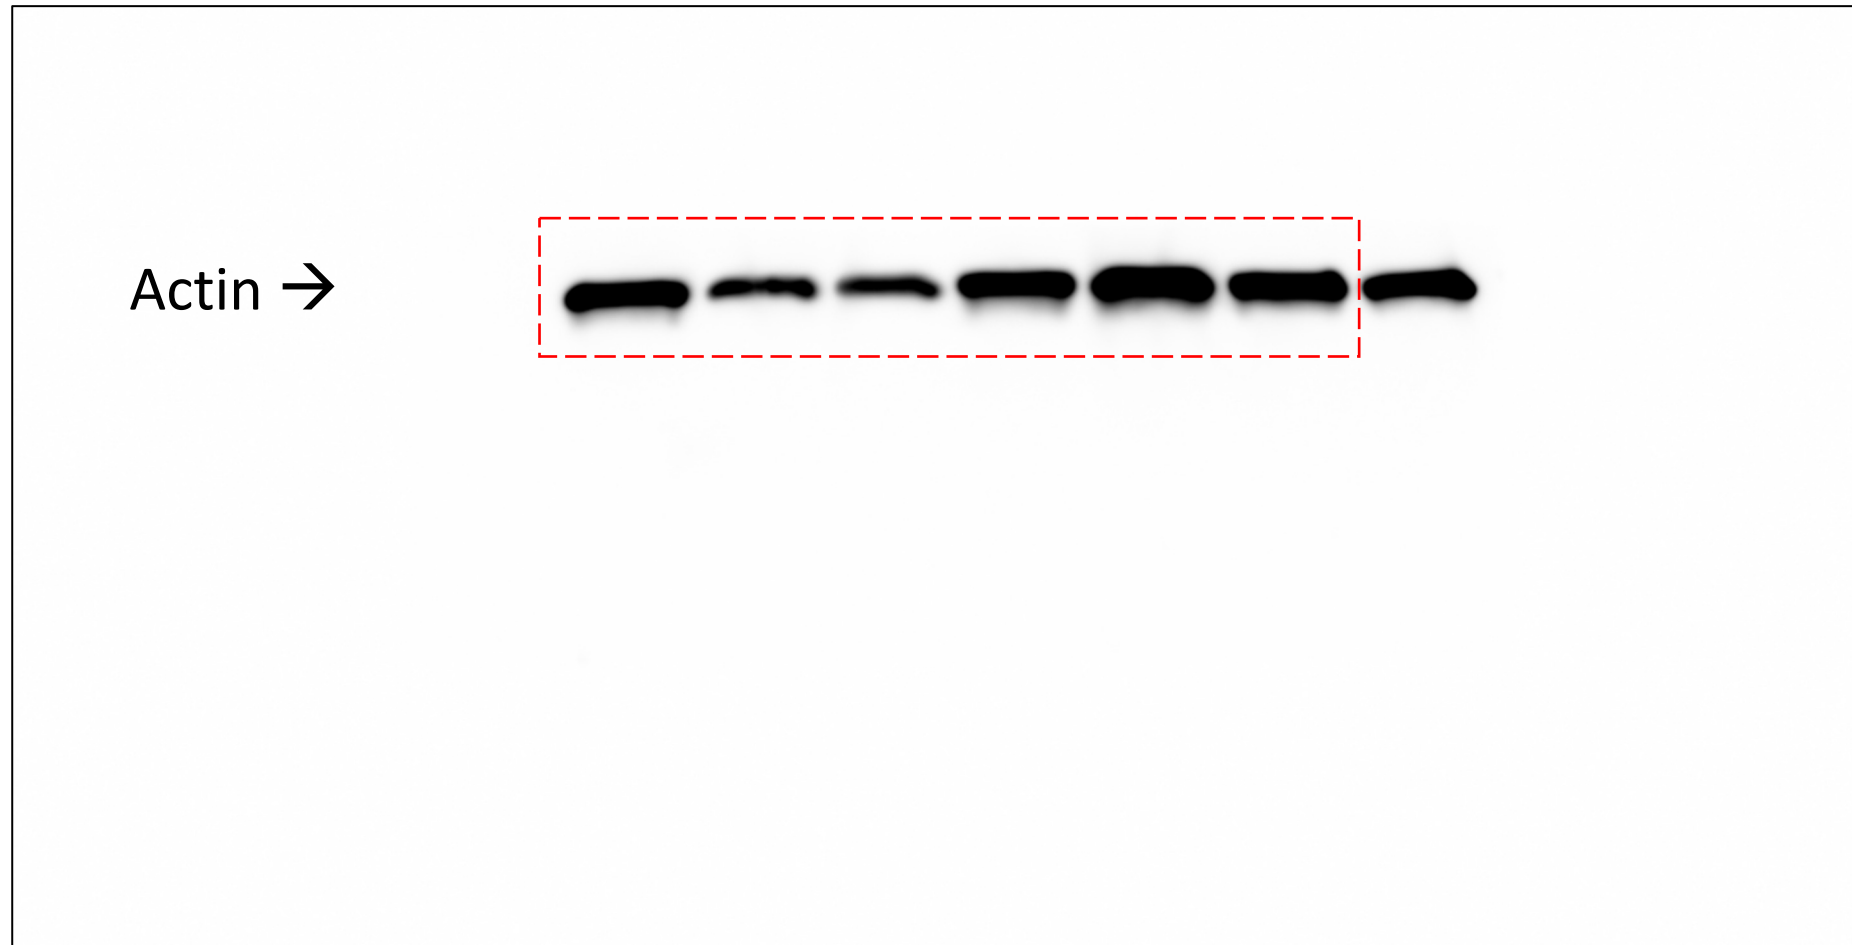

Fig. 1D raw data for Western blot using anti-I-CaD antibody (exp 1/3)

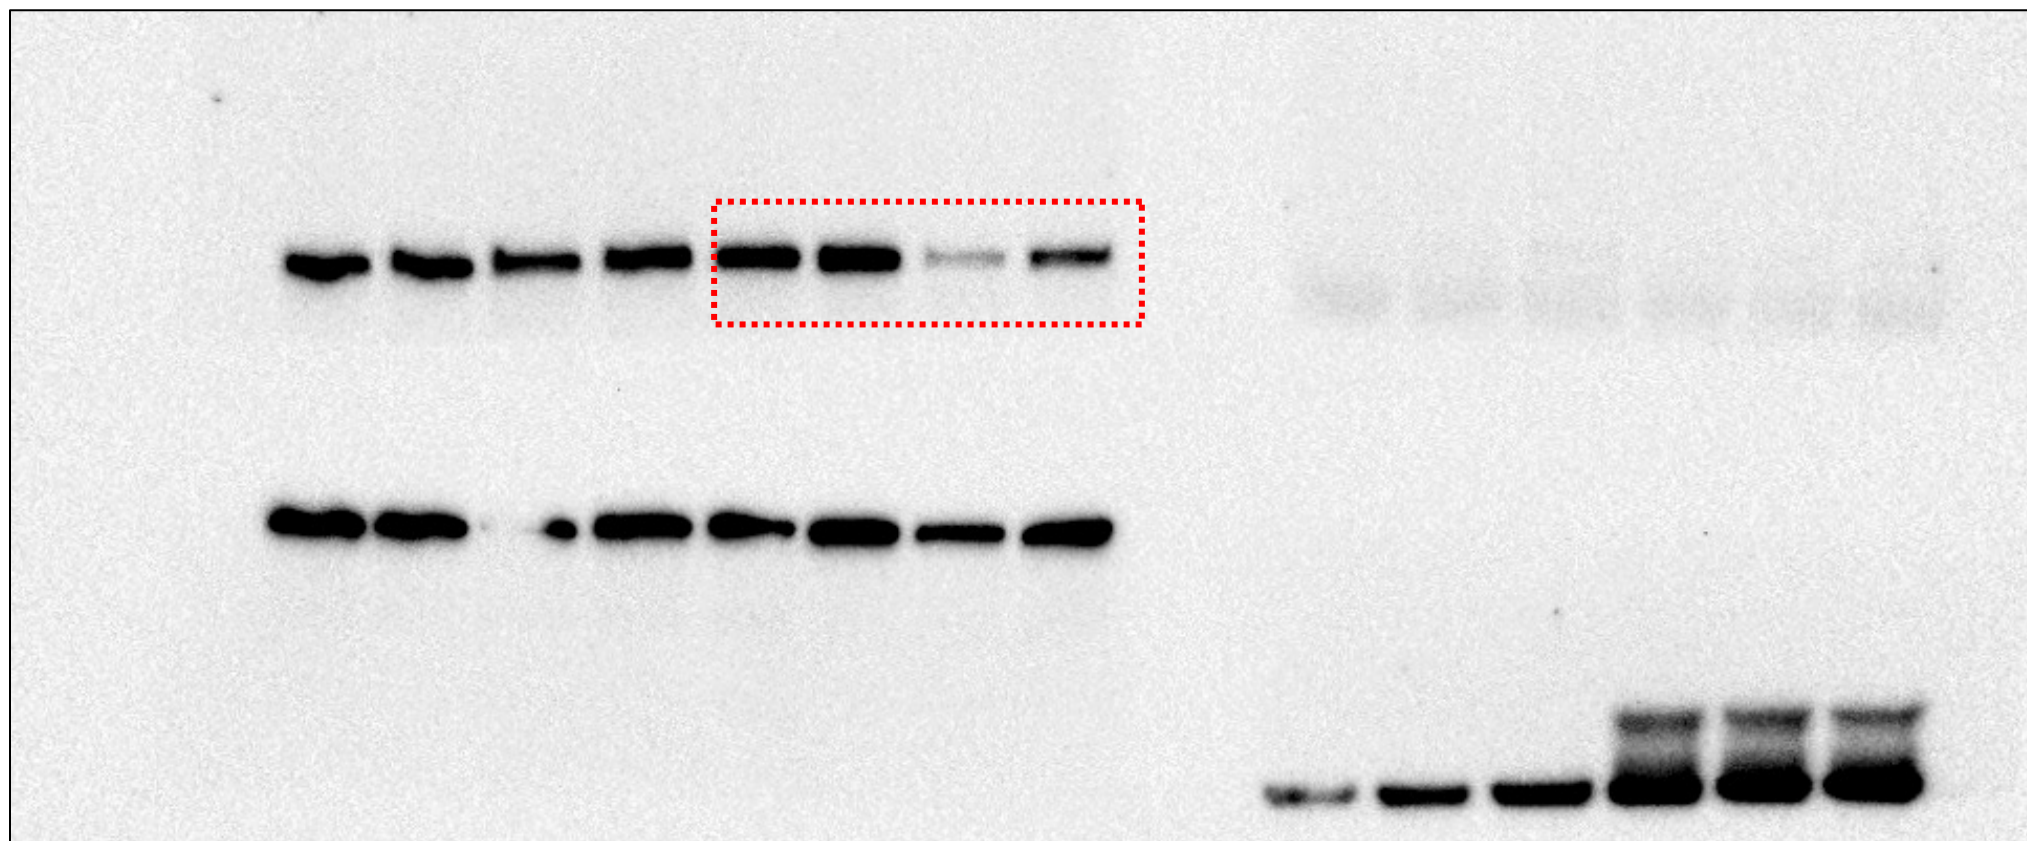

Fig. 1D raw data for Western blot using anti-actin antibody (exp 1/3)

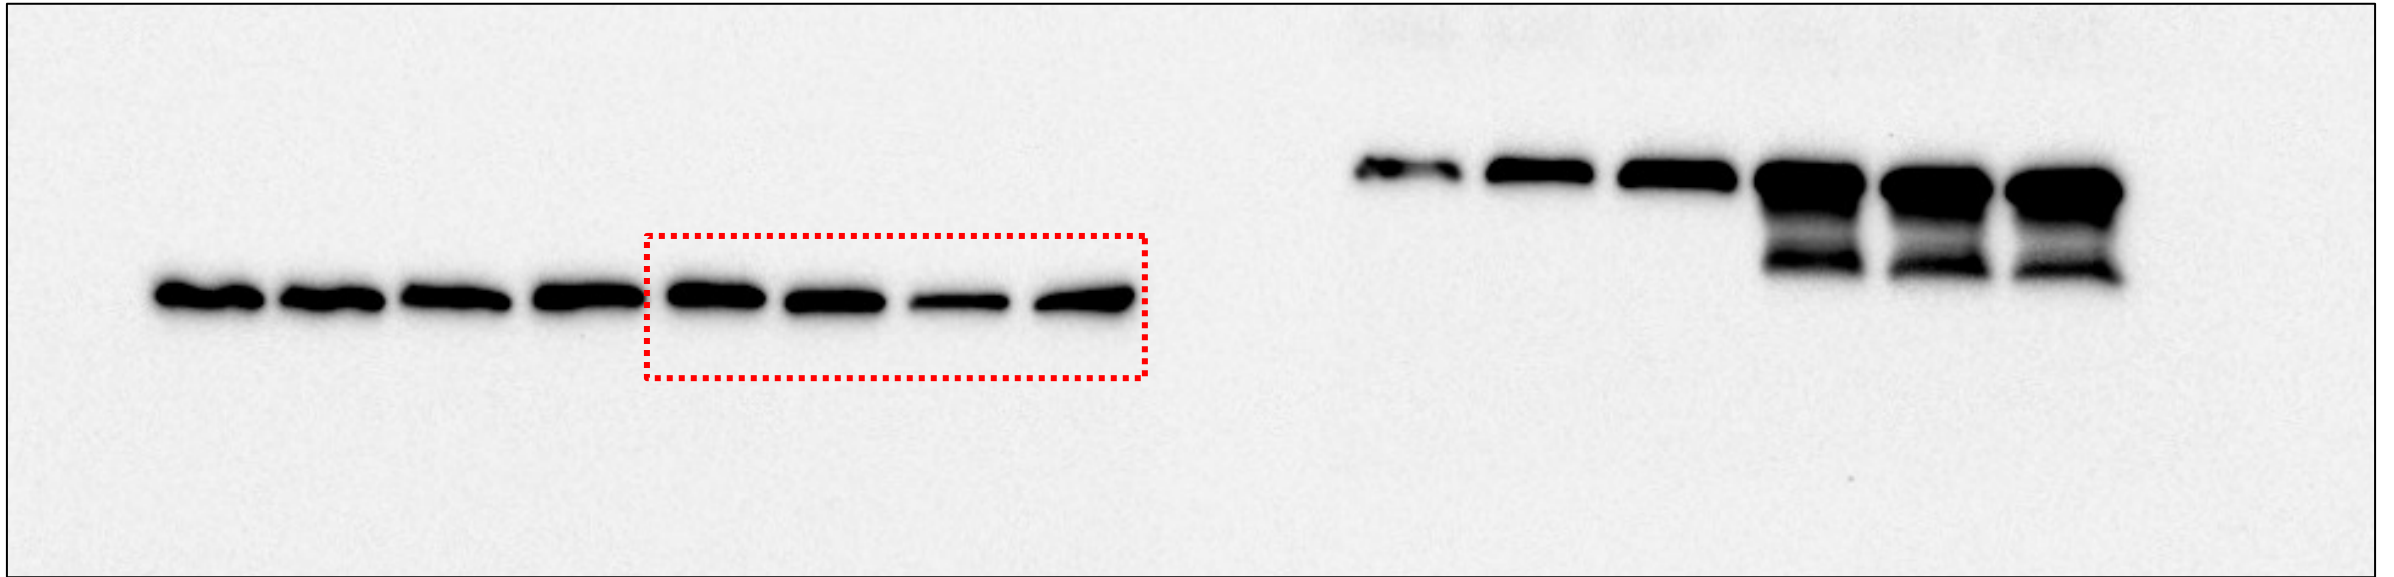

Fig. 1D raw data for Western blot using anti-I-CaD antibody (exp 2/3)

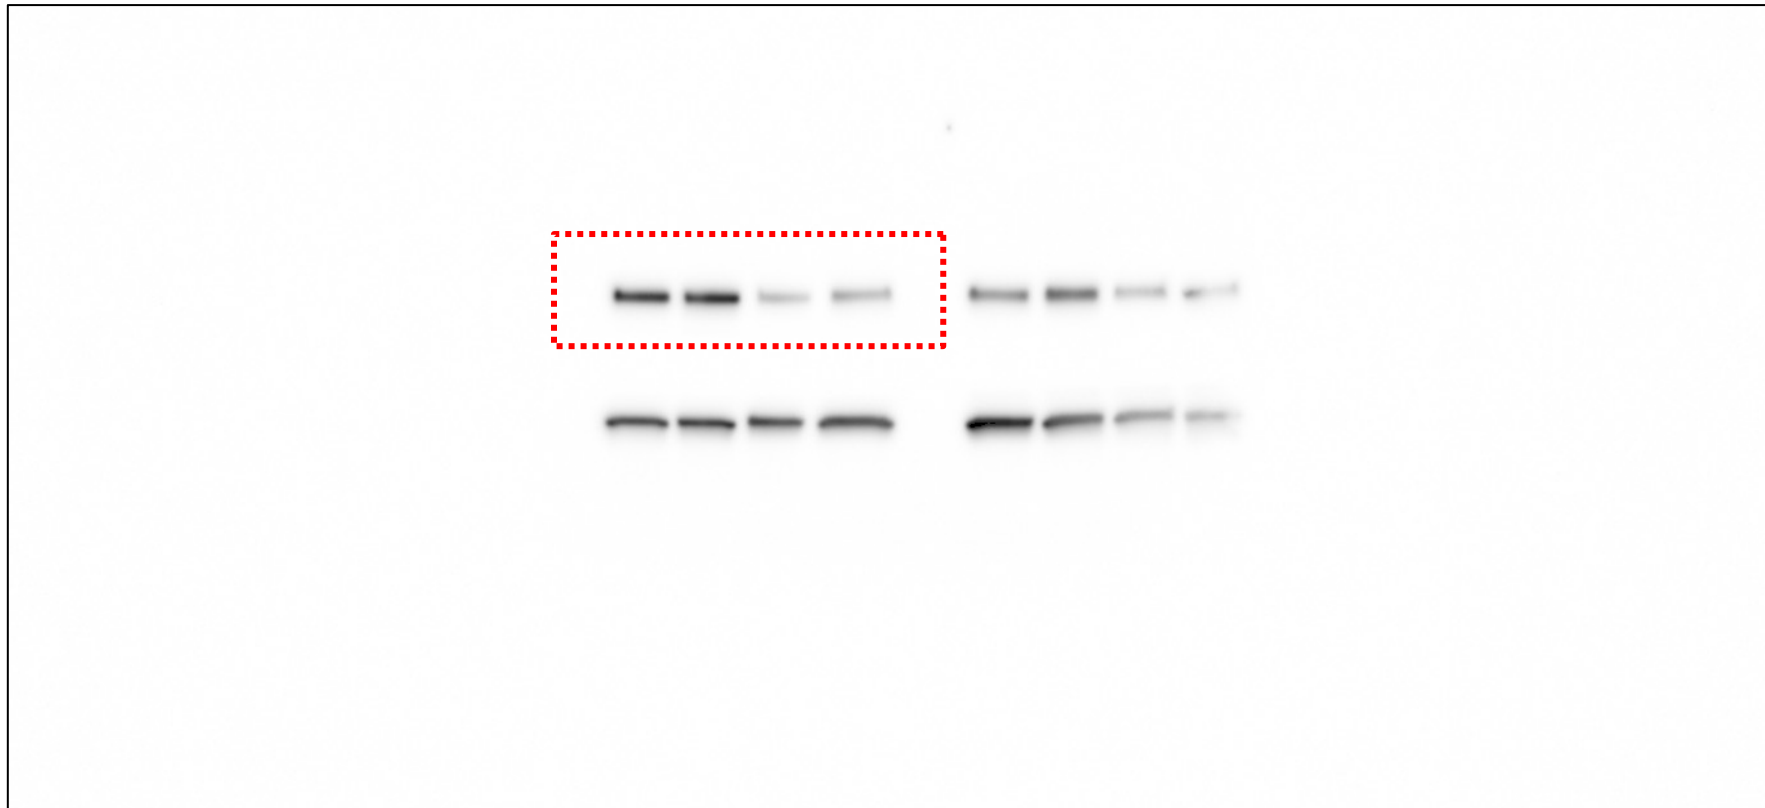

Fig. 1D raw data for Western blot using anti-actin antibody (exp 2/3)

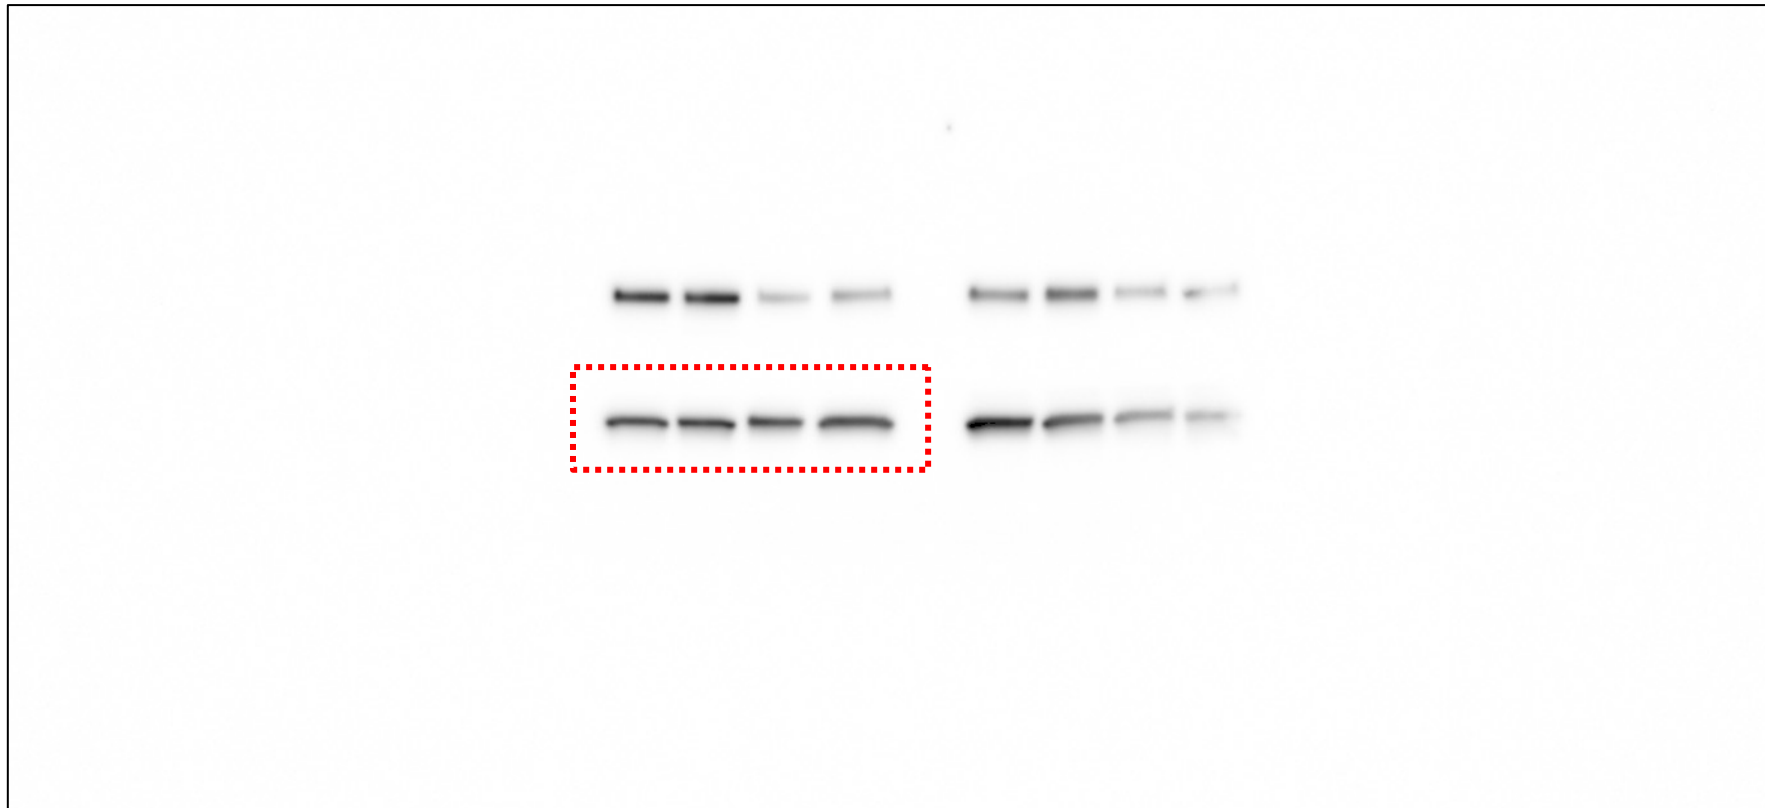

Fig. 1D raw data for Western blot using anti-I-CaD antibody (exp 3/3)

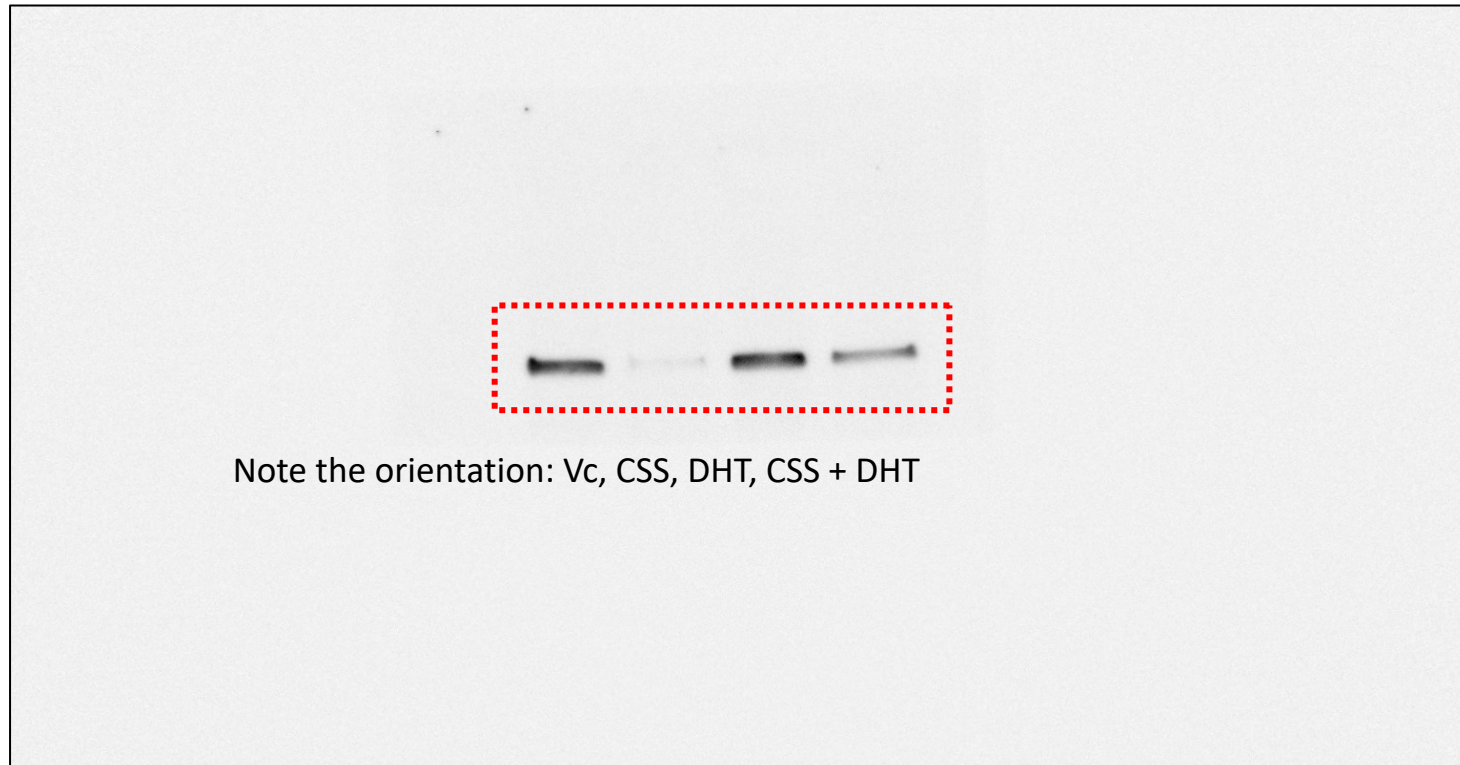

Fig. 1D raw data for Western blot using anti-actin antibody (exp 3/3)

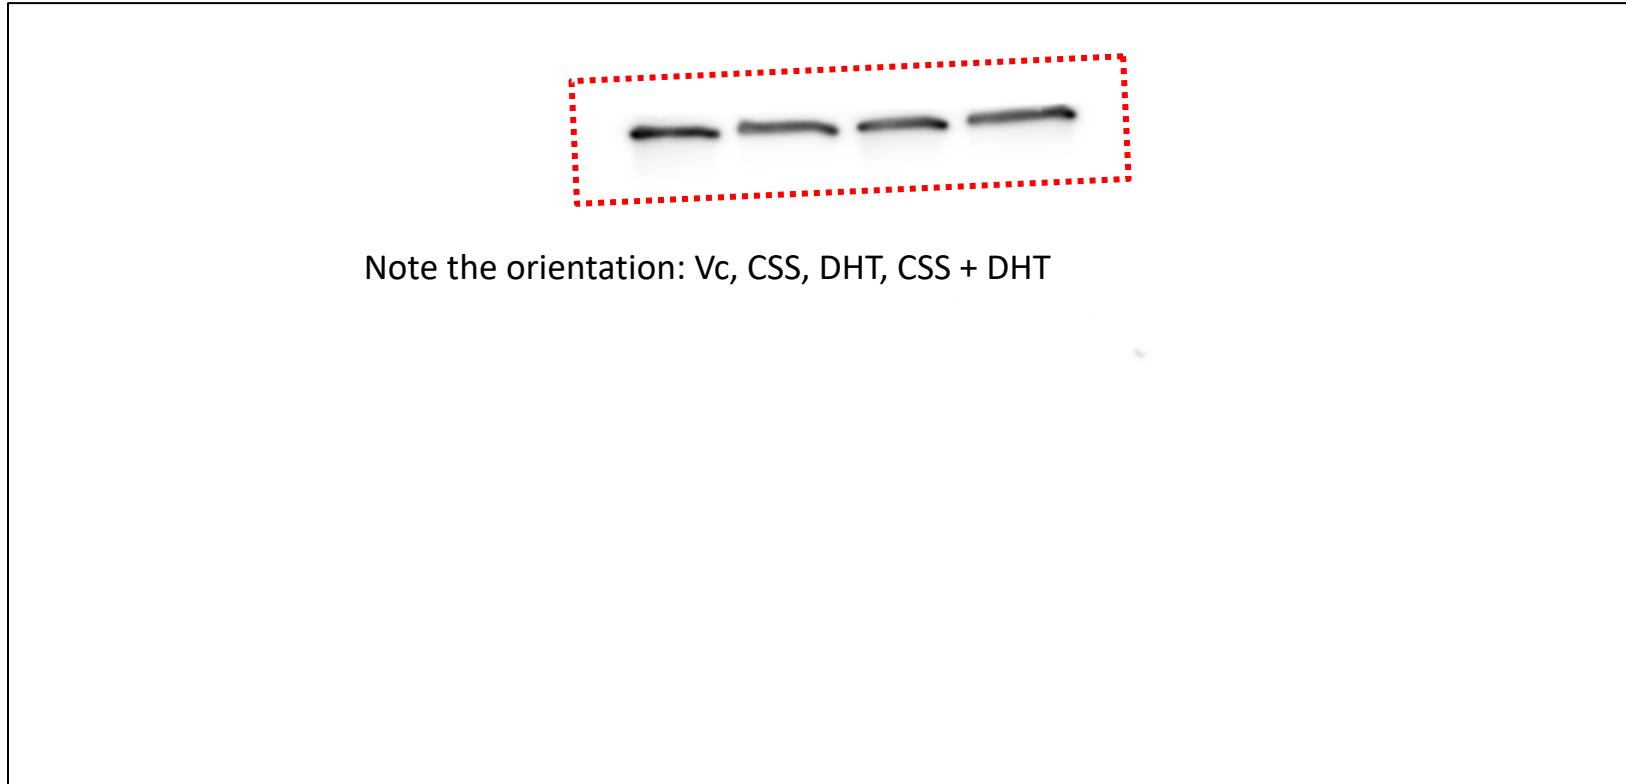



Fig. 2F raw data for Western blot using anti-I-CaD antibody

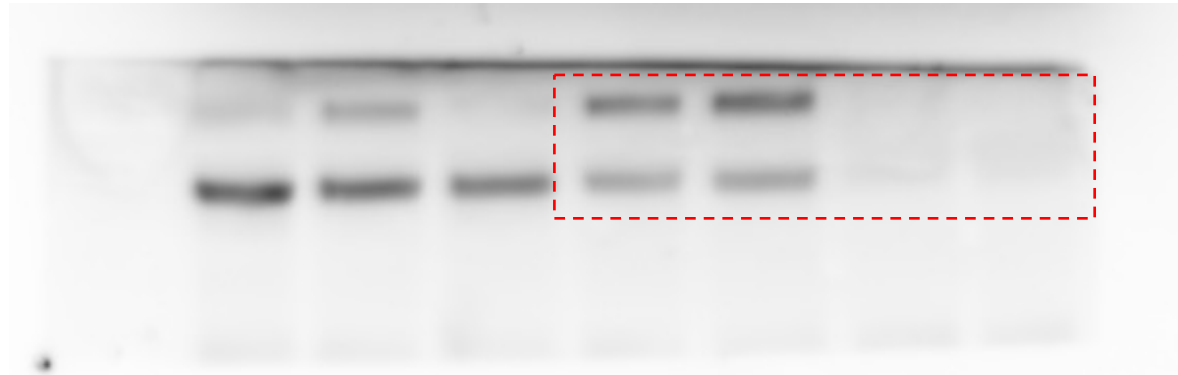

Fig. 2F raw data for Western blot using anti-vinculin antibody

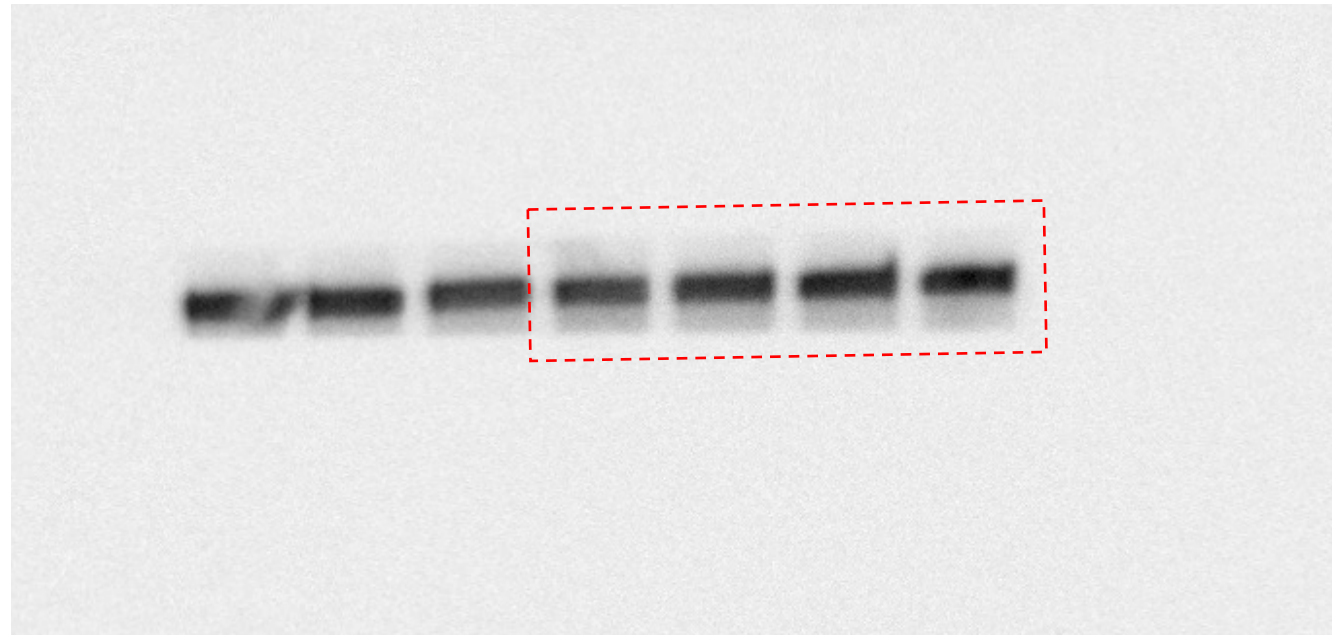

Fig. 2J raw data for Western blot using anti-I-CaD antibody

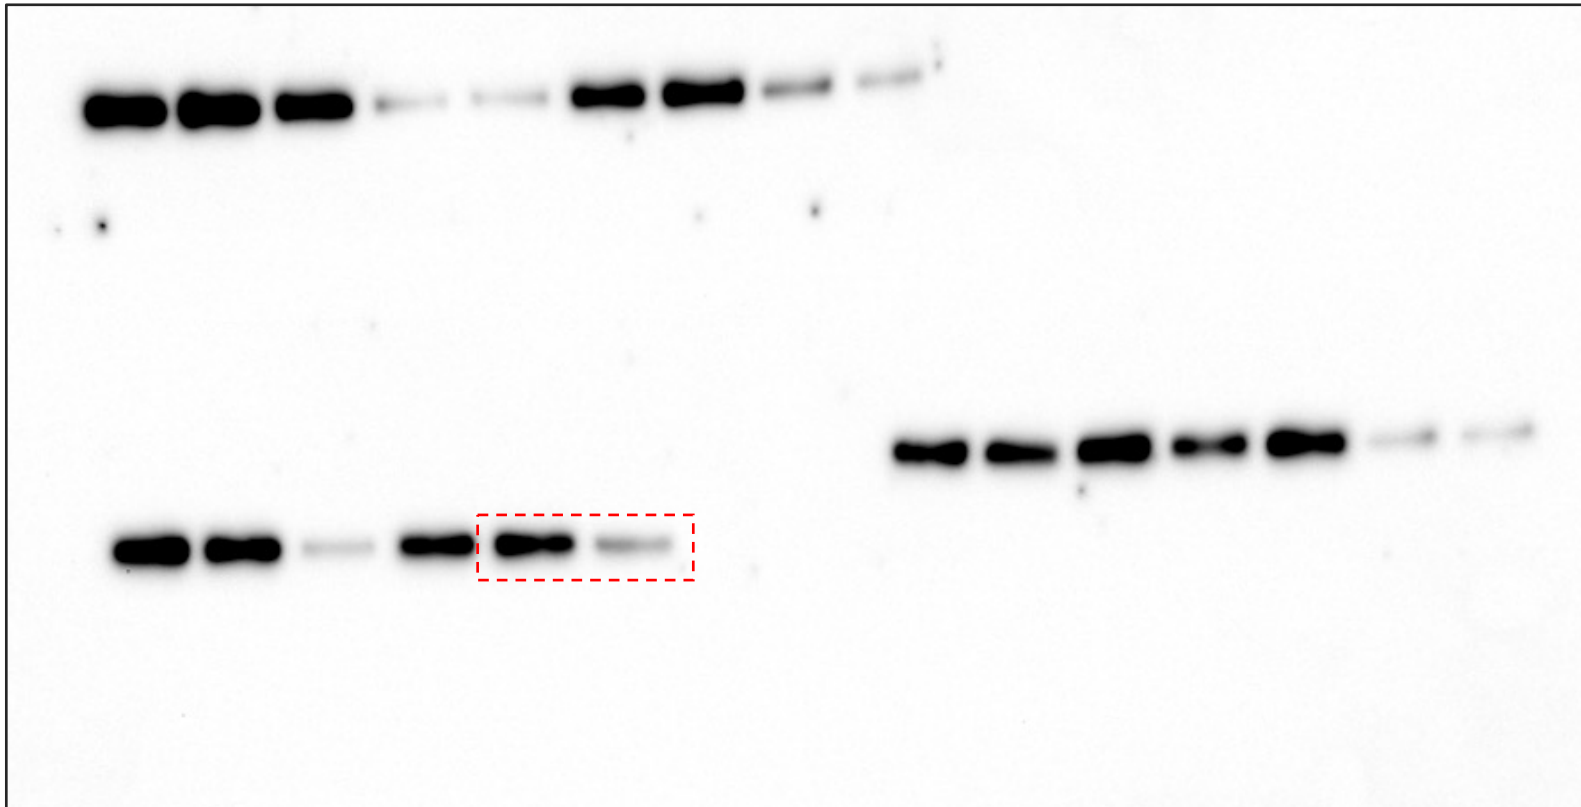

Fig. 2J raw data for Western blot using anti-vinculin antibody

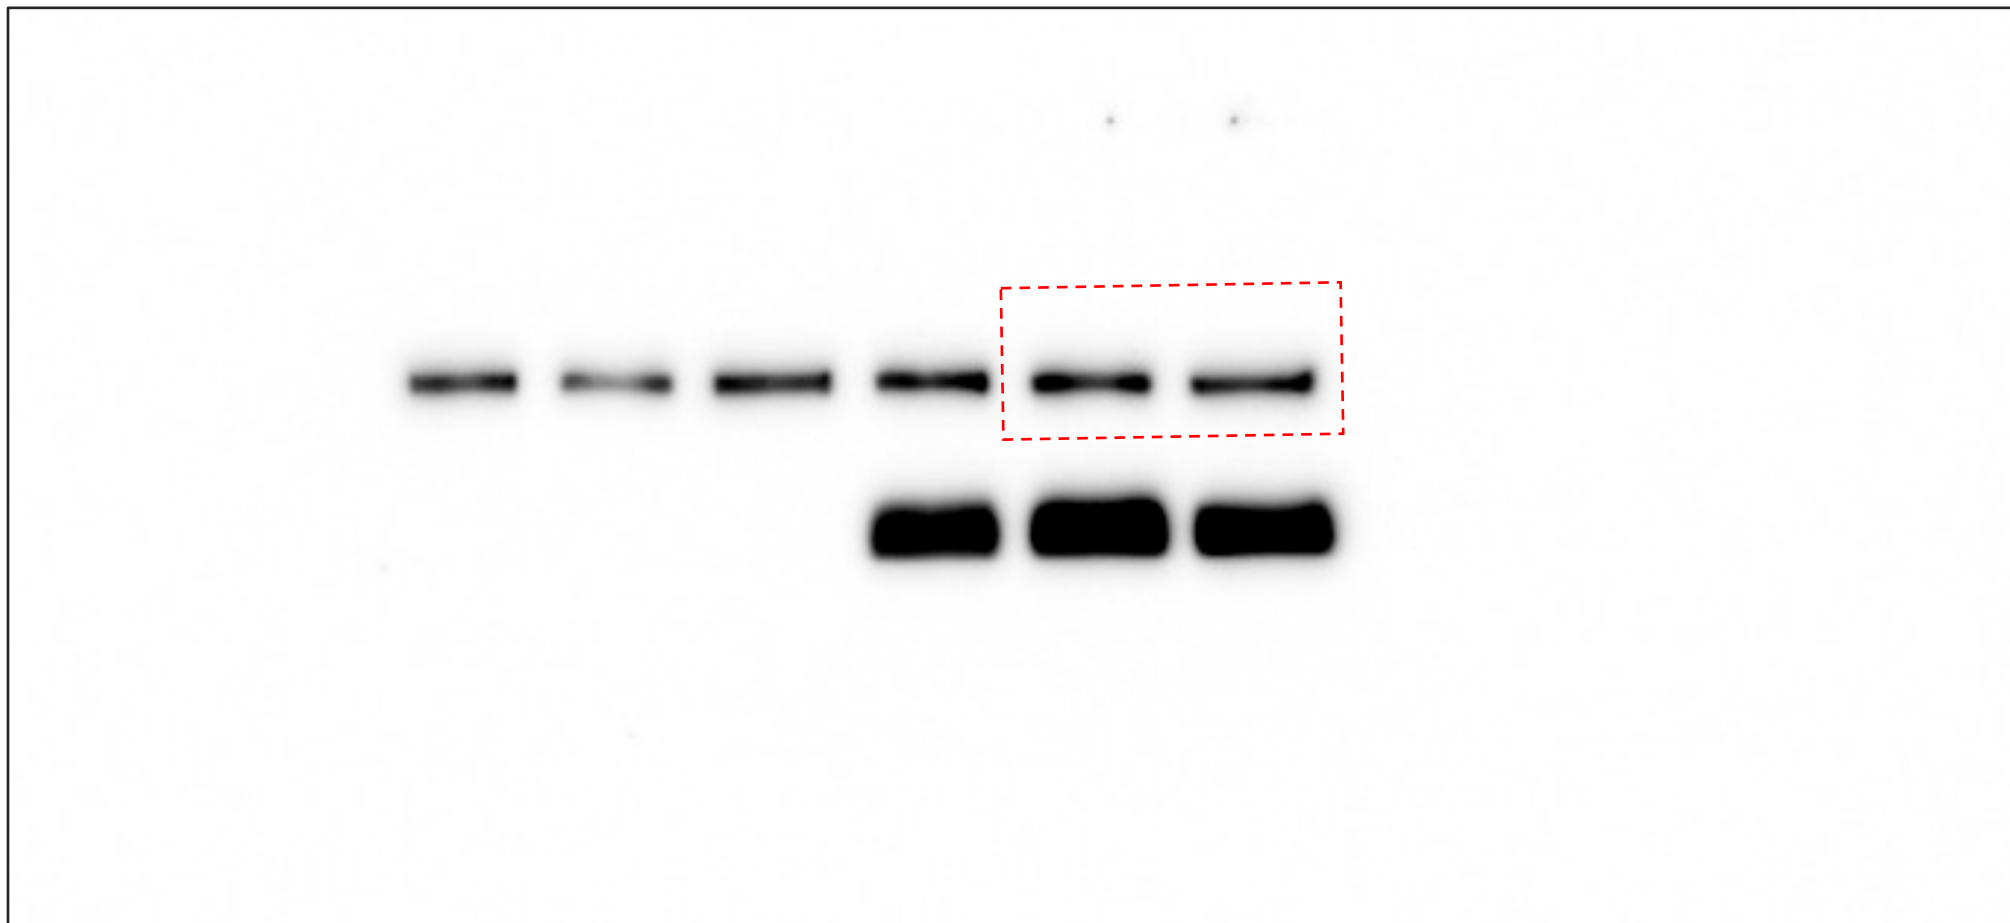

Fig. 3B raw data for Western blot using anti-GR antibody

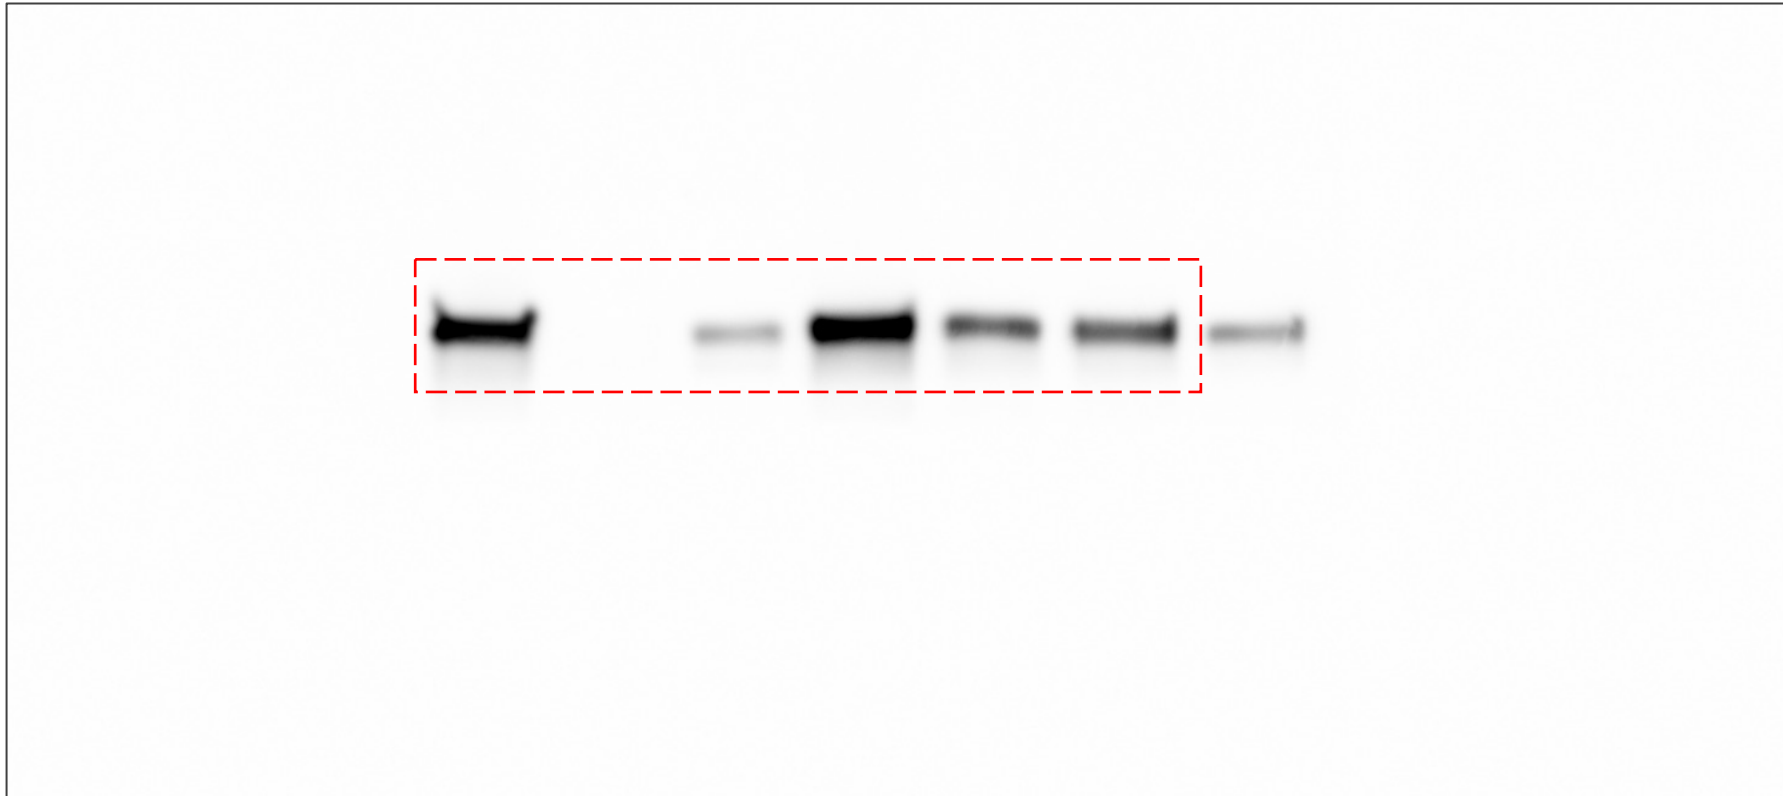

Fig. 3B raw data for Western blot using anti-actin antibody

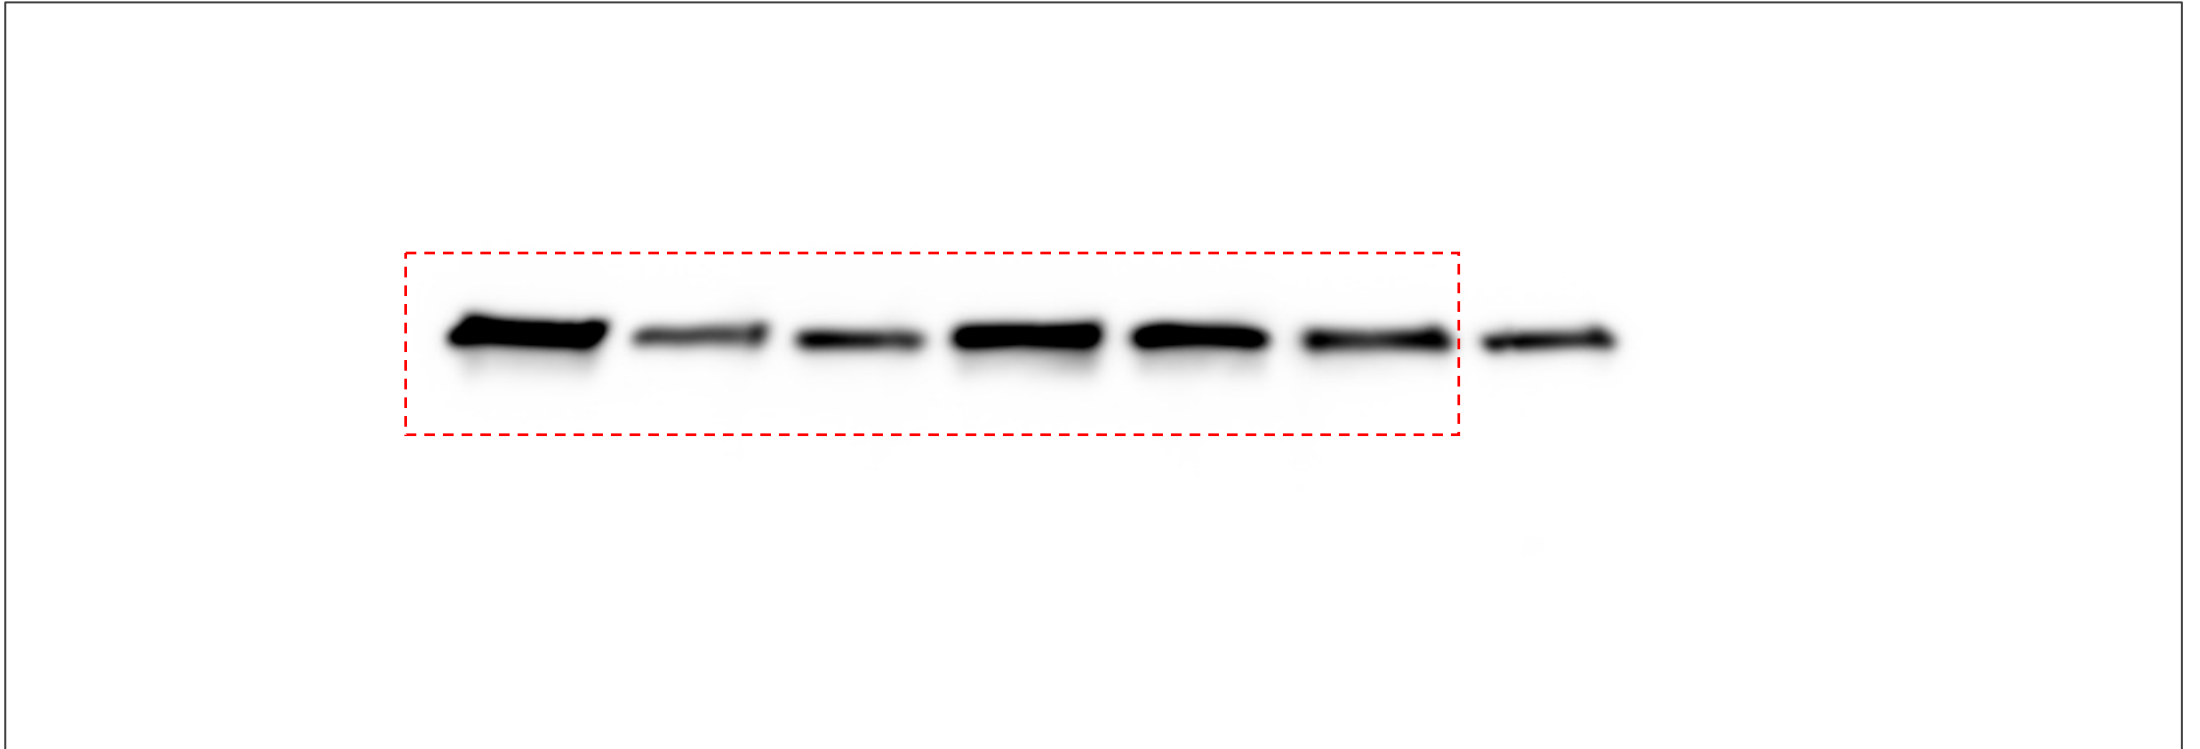

Fig. 3D raw data for Western blot using anti-I-CaD antibody (exp 1/3)

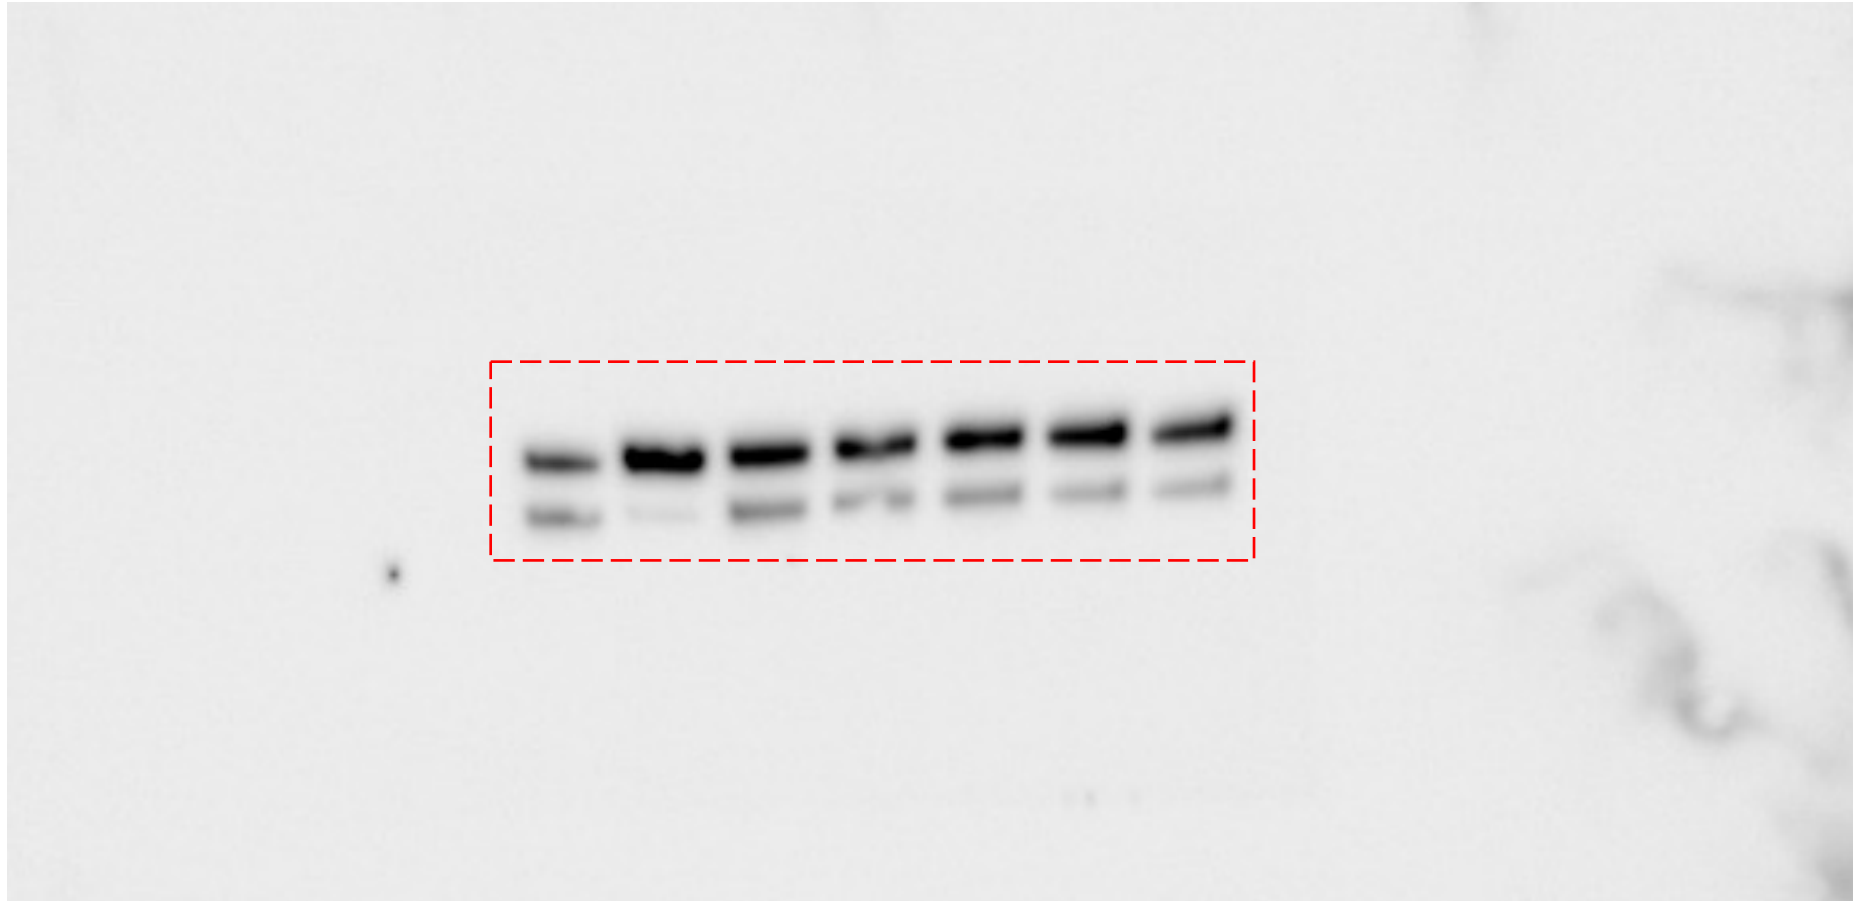

Fig. 3D raw data for Western blot using anti-vinculin antibody (exp 1/3)

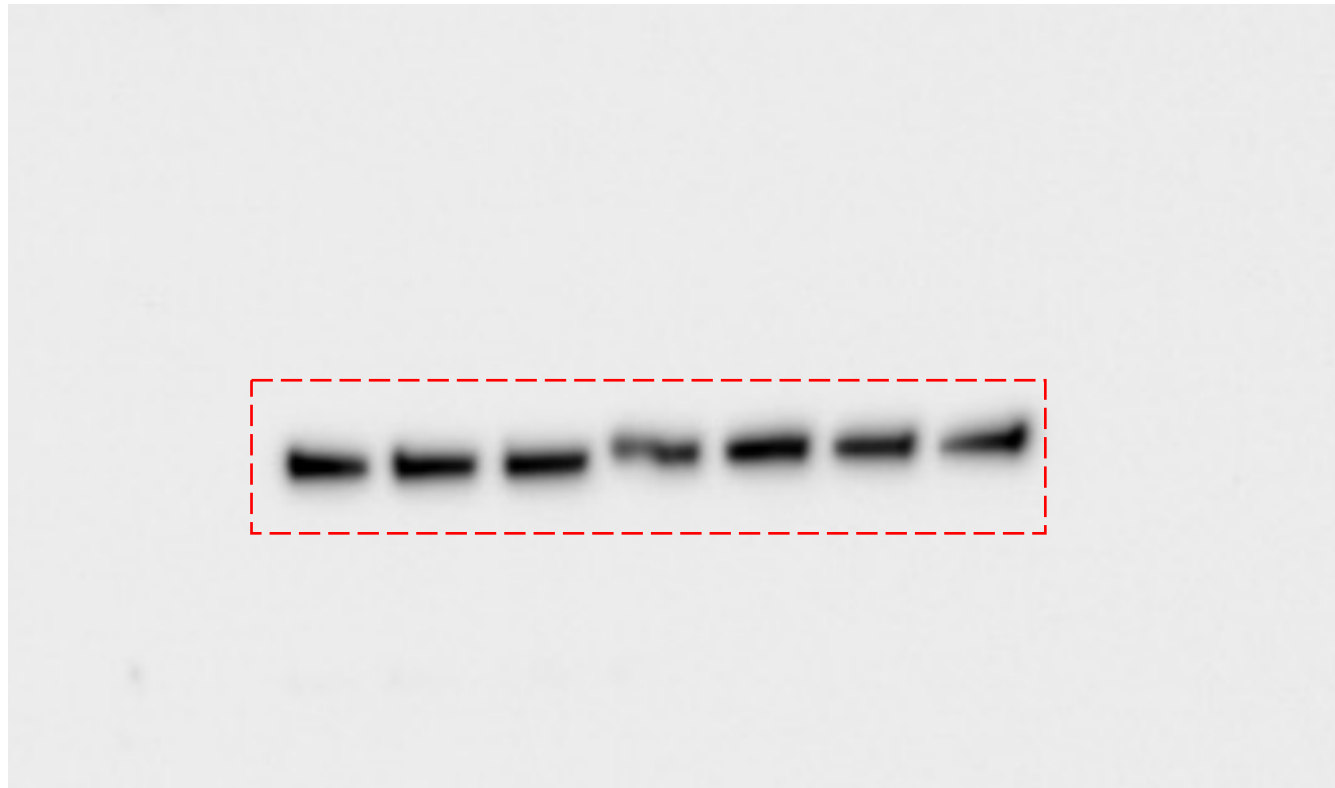



Fig. 3D raw data for Western blot using anti-I-CaD antibody (exp 2/3)

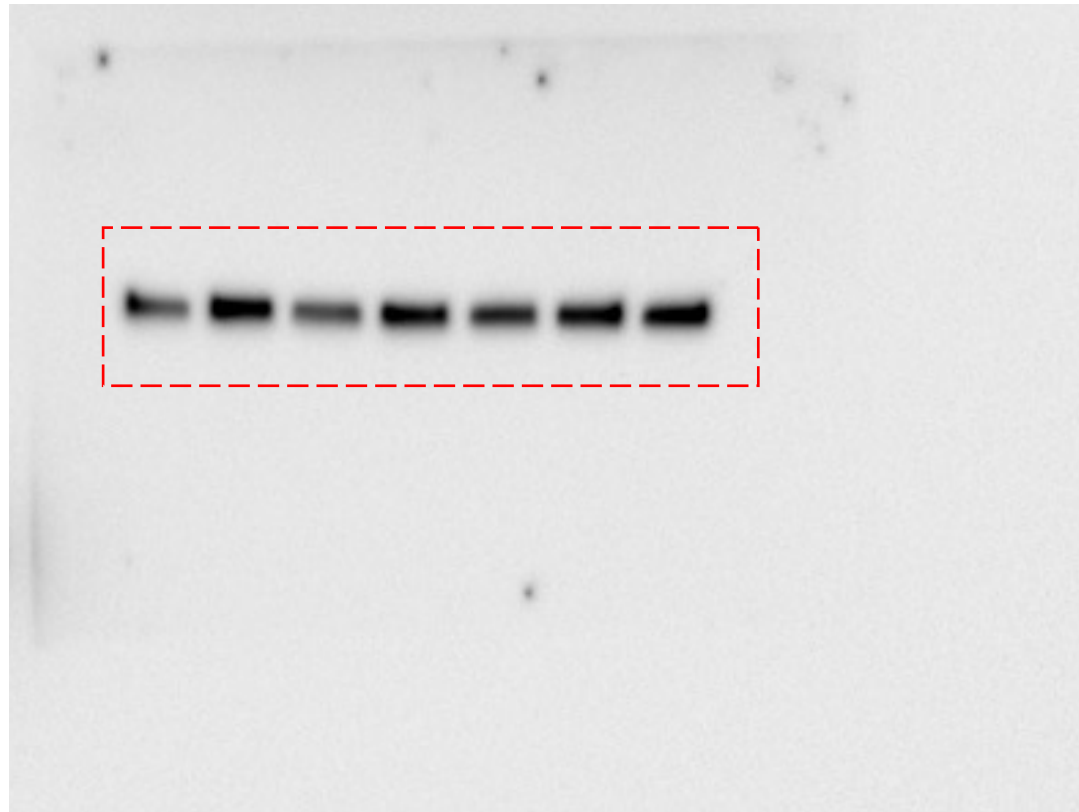

Fig. 3D raw data for Western blot using anti-actin antibody (exp 2/3)

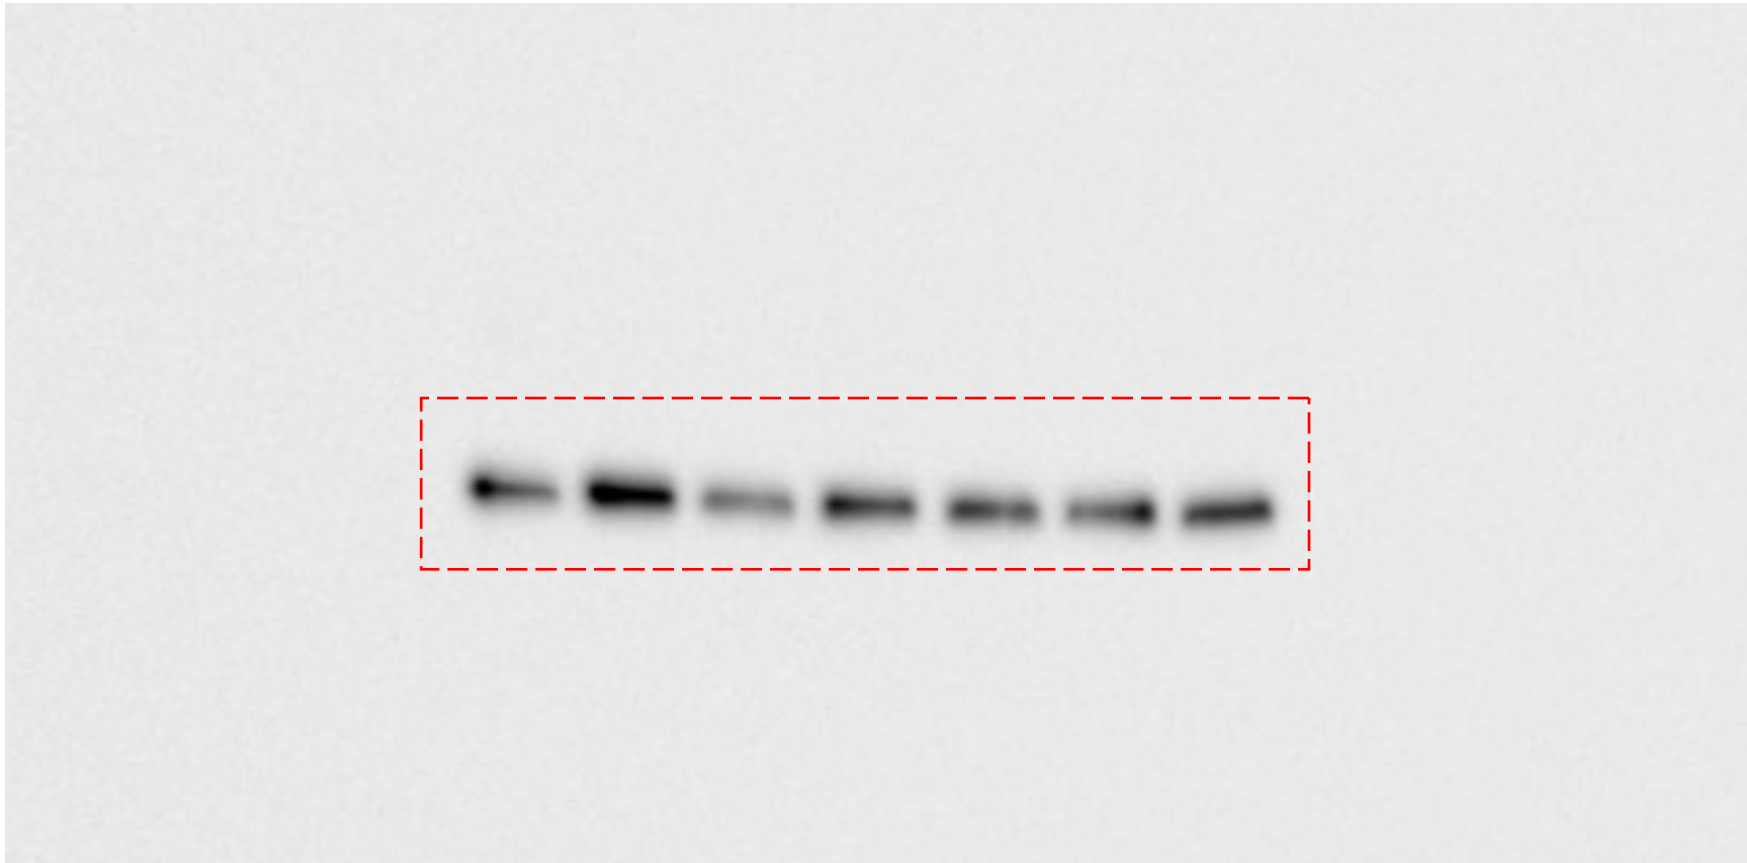

Fig. 3D raw data for Western blot using anti-I-CaD antibody (exp 3/3)

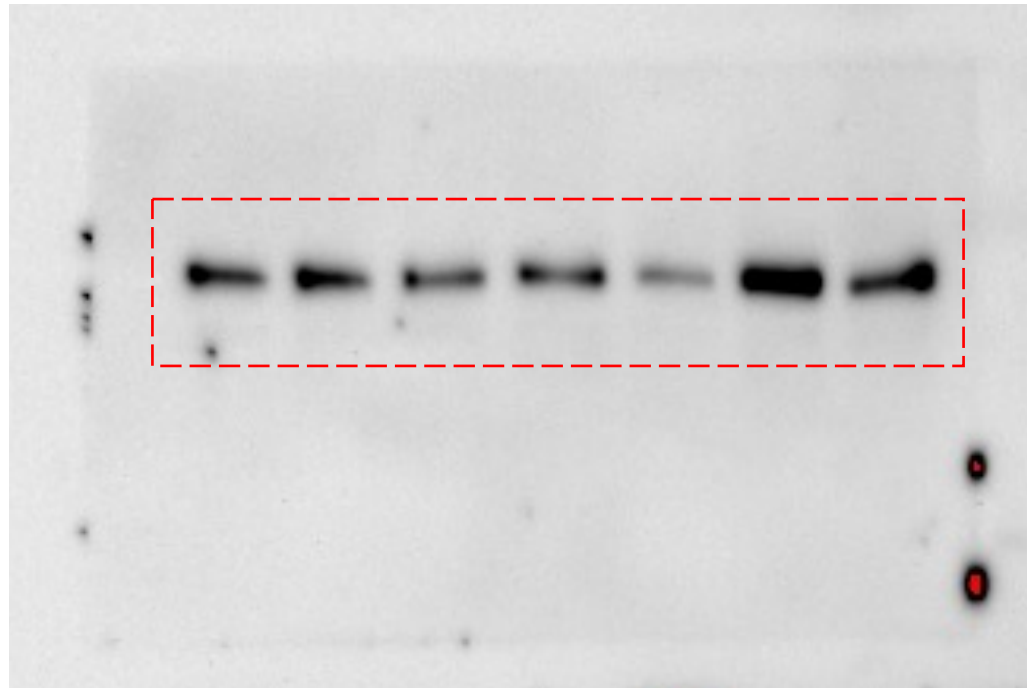

Fig. 3D raw data for Western blot using anti-actin antibody (exp 3/3)

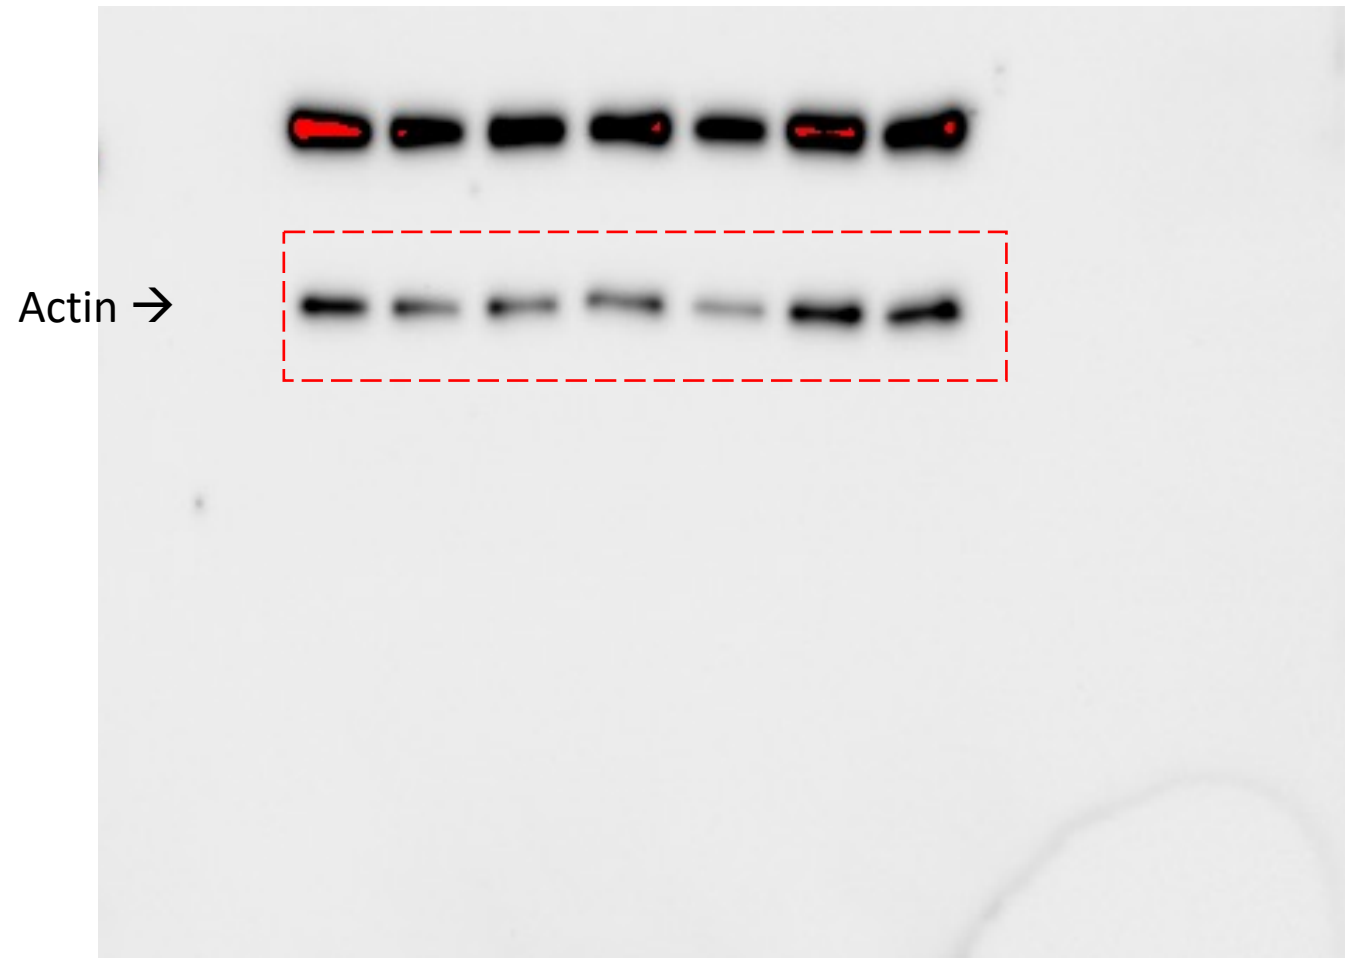

Fig. 3E raw data for Western blot using anti-I-CaD antibody (exp 1/3)

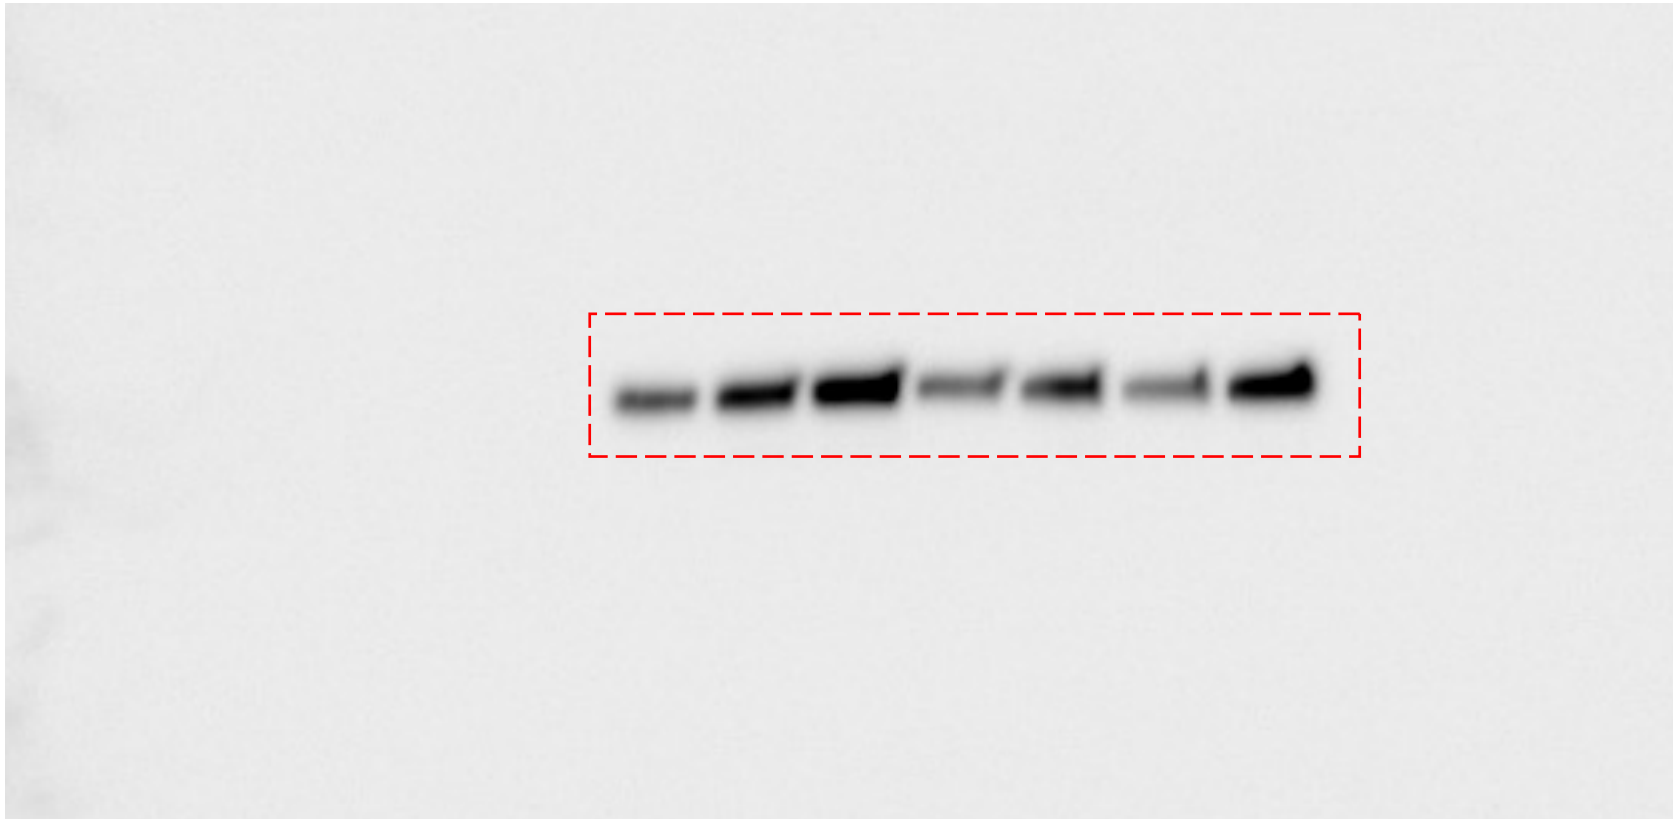

Fig. 3E raw data for Western blot using anti-actin antibody (exp 1/3)

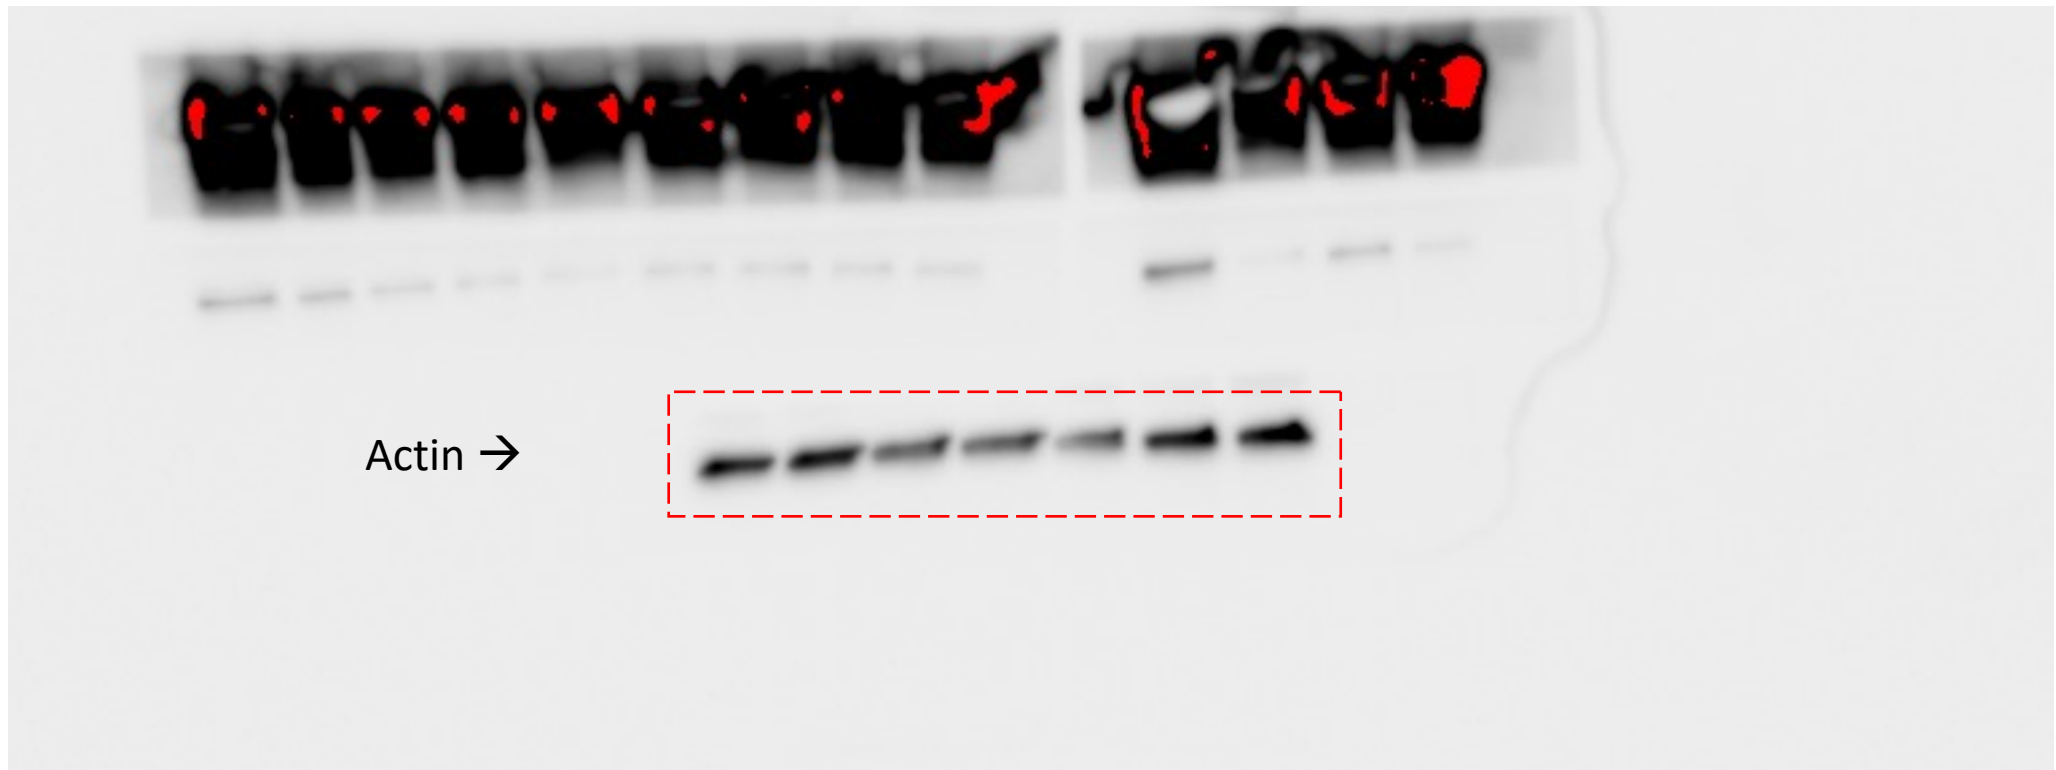

Fig. 3E raw data for Western blot using anti-I-CaD antibody (exp 2/3)

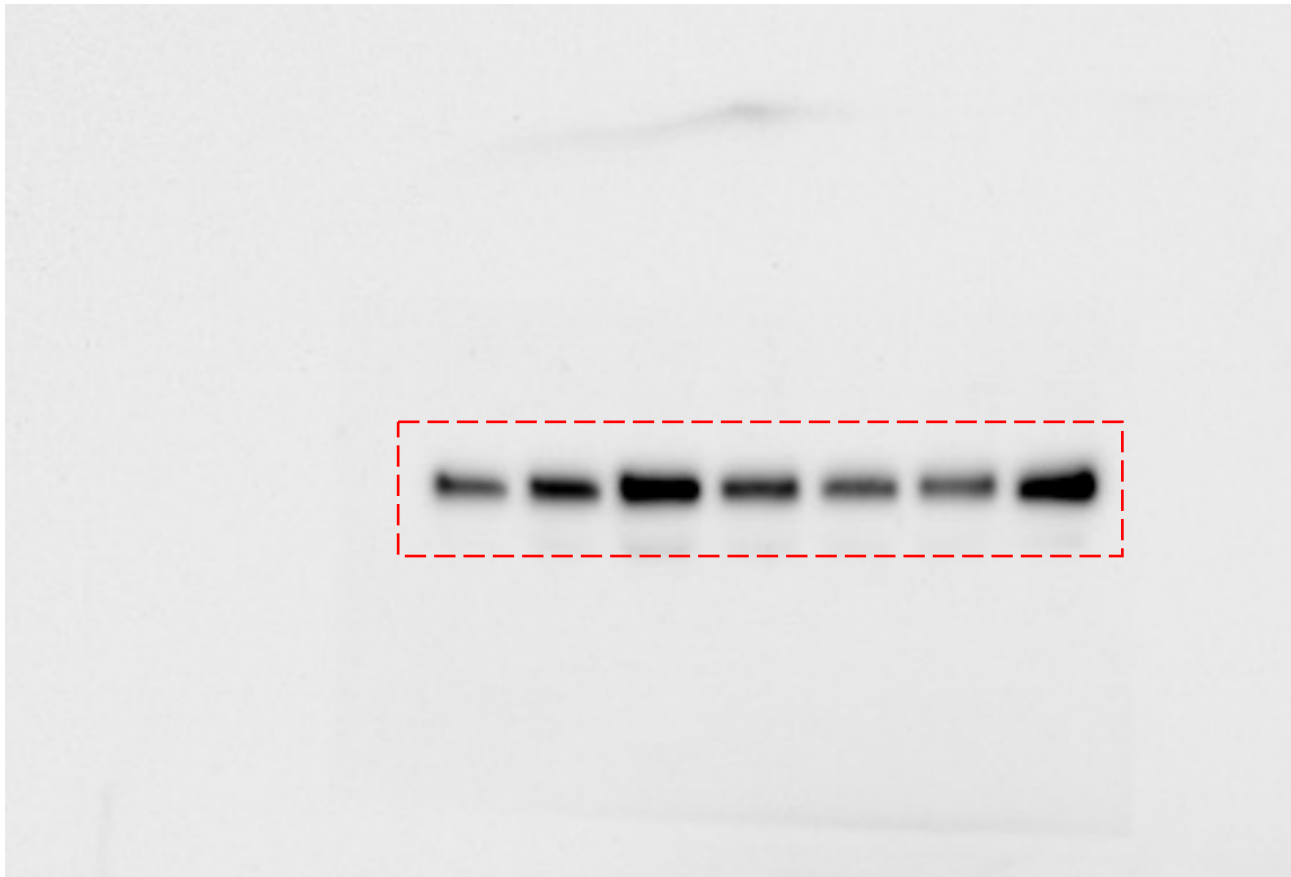

Fig. 3E raw data for Western blot using anti-actin antibody (exp 2/3)

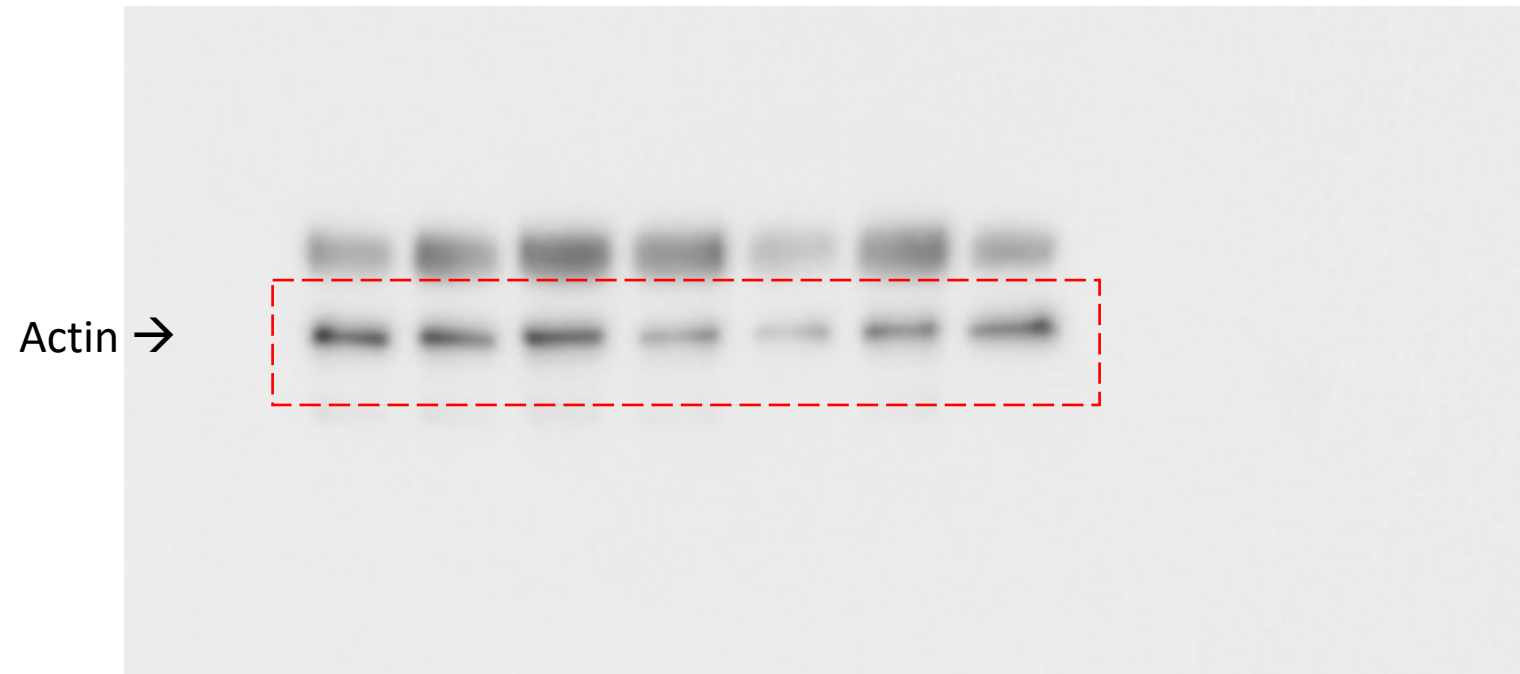



Fig. 3E raw data for Western blot using anti-I-CaD antibody (exp 3/3)

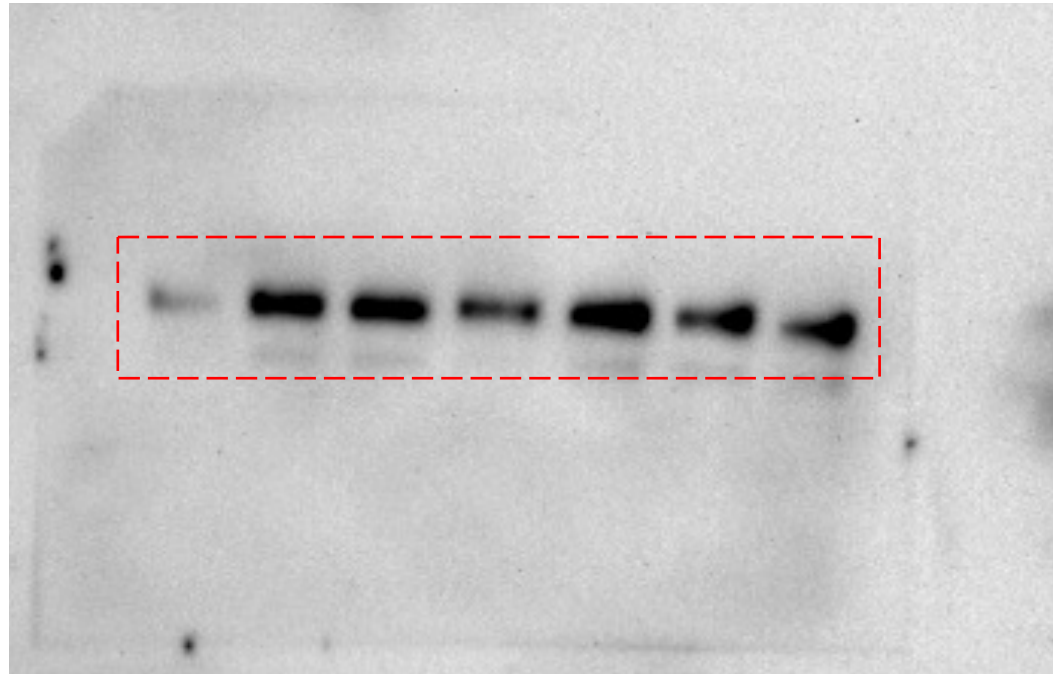

Fig. 3E raw data for Western blot using anti-actin antibody (exp 3/3)

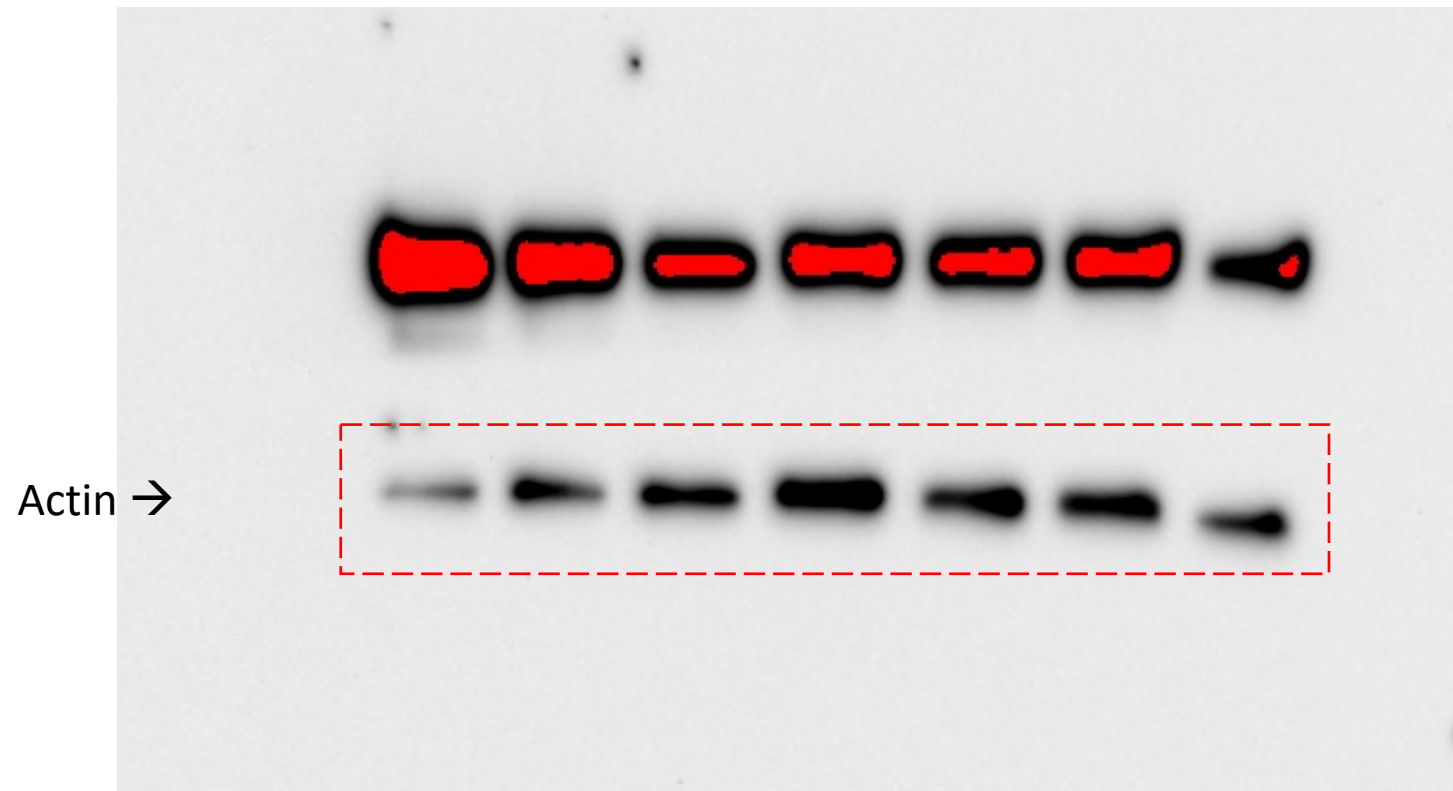

Fig. 3F raw data for Western blot using anti-I-CaD antibody (exp 1/3)

DU145 exp. 1; Caldesmon

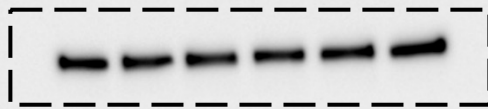

Note the orientation: **0**, 0.05, **0.1**, 0.5, **1**, **10** μM

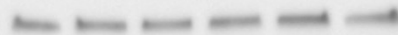

Fig. 3F raw data for Western blot using anti-actin antibody (exp 1/3)

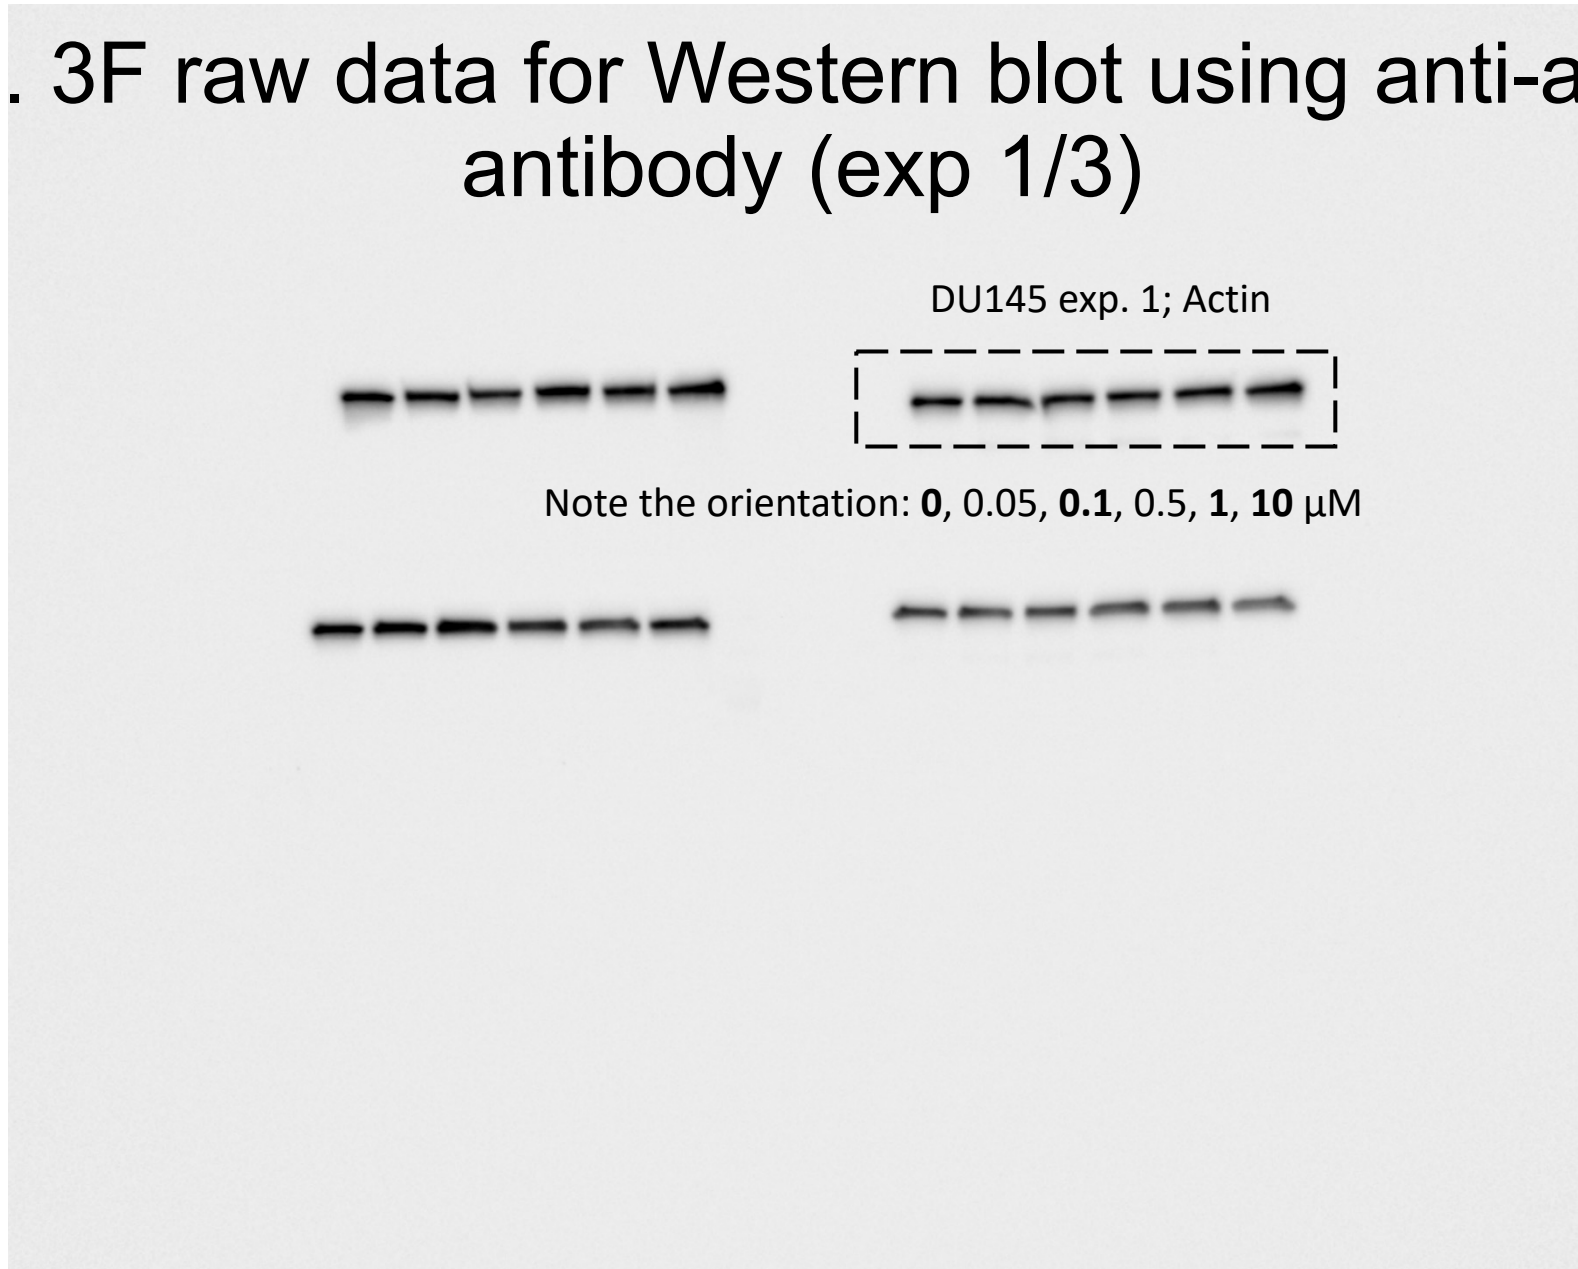

Fig. 3F raw data for Western blot using anti-I-CaD antibody (exp 2/3)

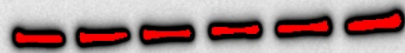

DU145 exp. 2; Caldesmon

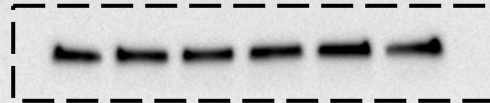

Note the orientation: **0**, 0.05, **0.1**, 0.5, **1**, **10**  $\mu$ M

Fig. 3F raw data for Western blot using anti-actin antibody (exp 2/3)

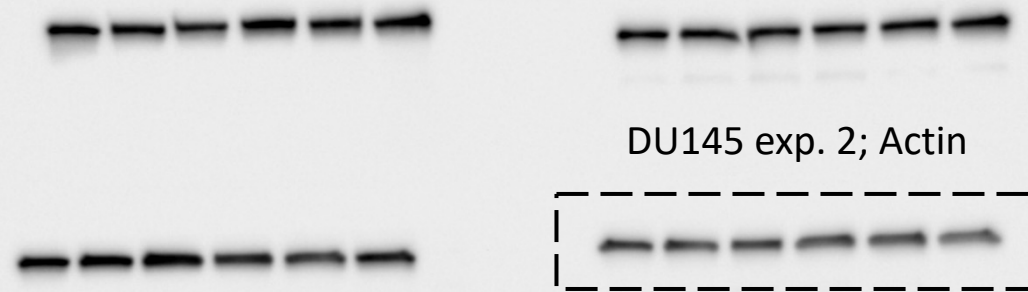

Note the orientation: **0**, 0.05, **0.1**, 0.5, **1**, **10**  $\mu\text{M}$

Fig. 3F raw data for Western blot using anti-I-CaD antibody (exp 3/3)

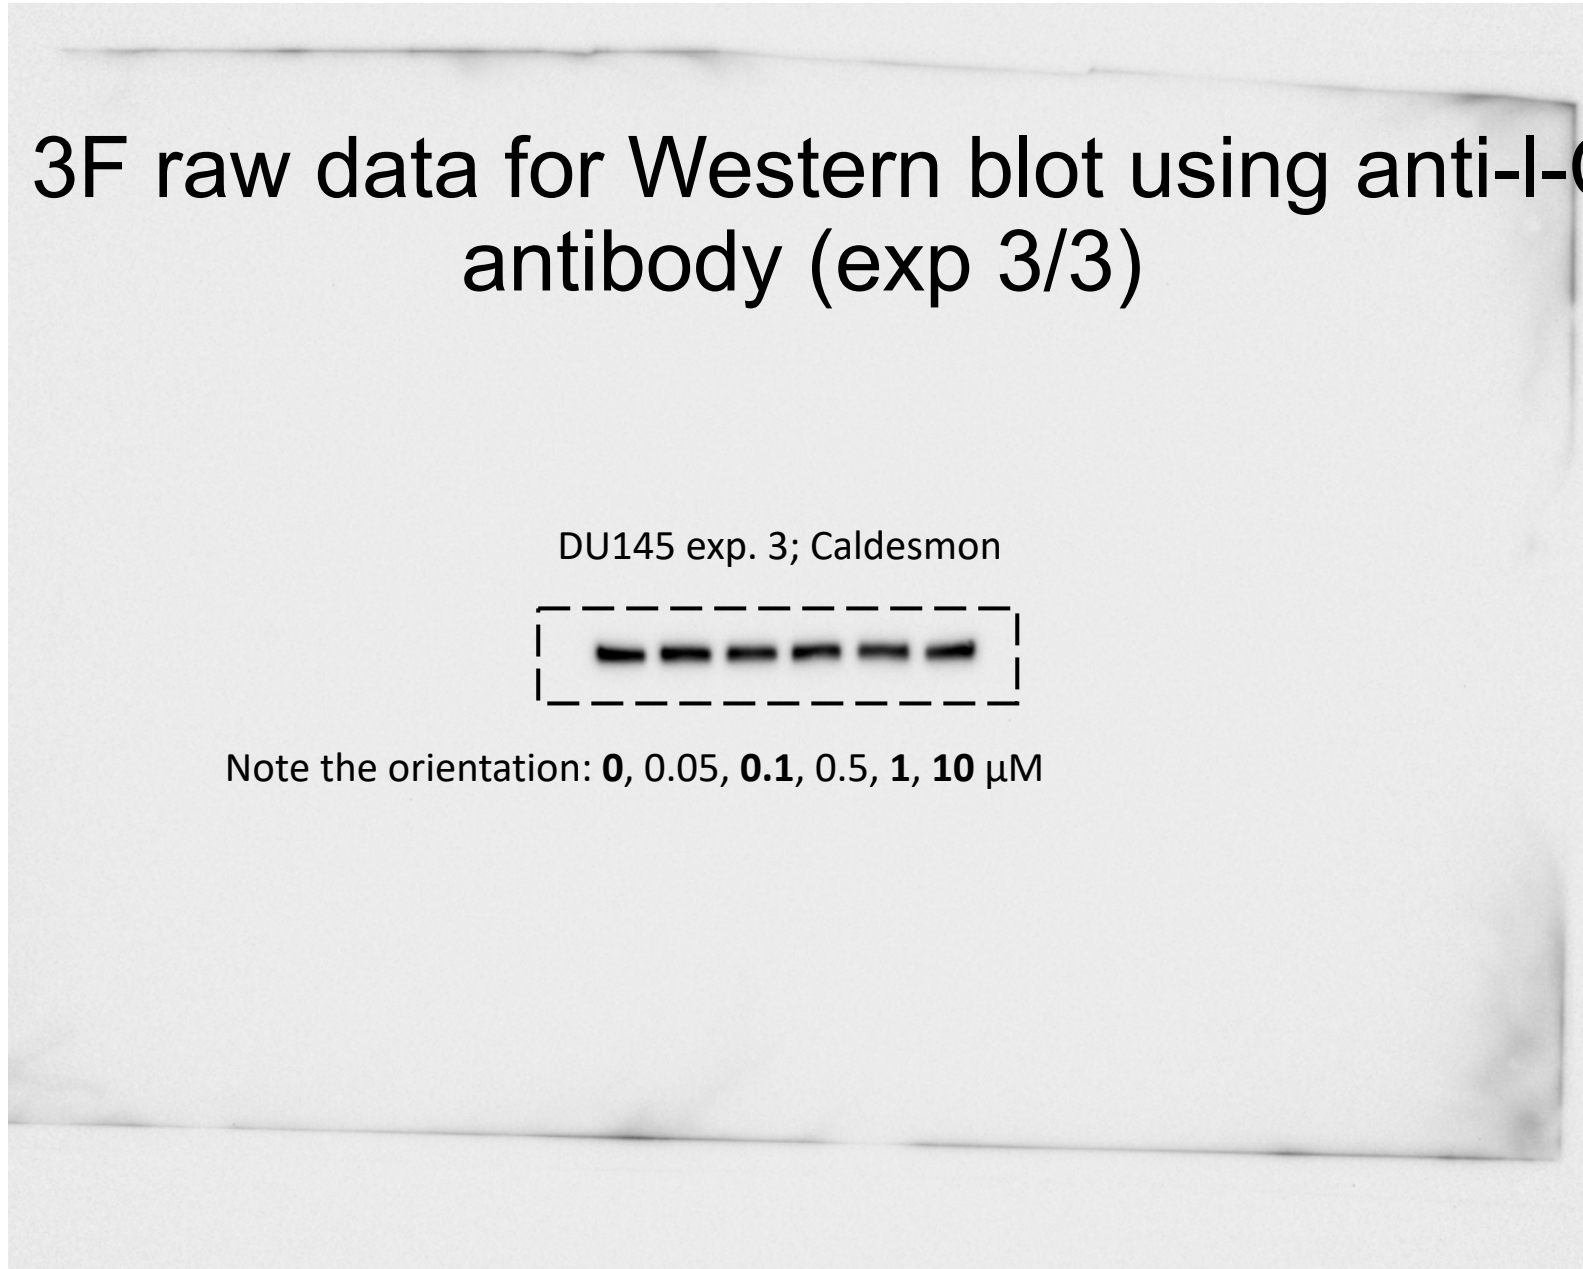

# Fig. 3F raw data for Western blot using anti-actin antibody (exp 3/3)

DU145 exp. 3; Actin

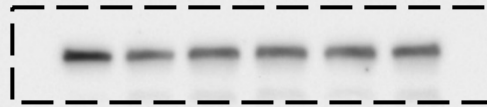

Note the orientation: **0**, 0.05, **0.1**, 0.5, **1**, **10**  $\mu\text{M}$



Fig. 5A raw data for Western blot using anti-I-CaD antibody (exps 1/3)

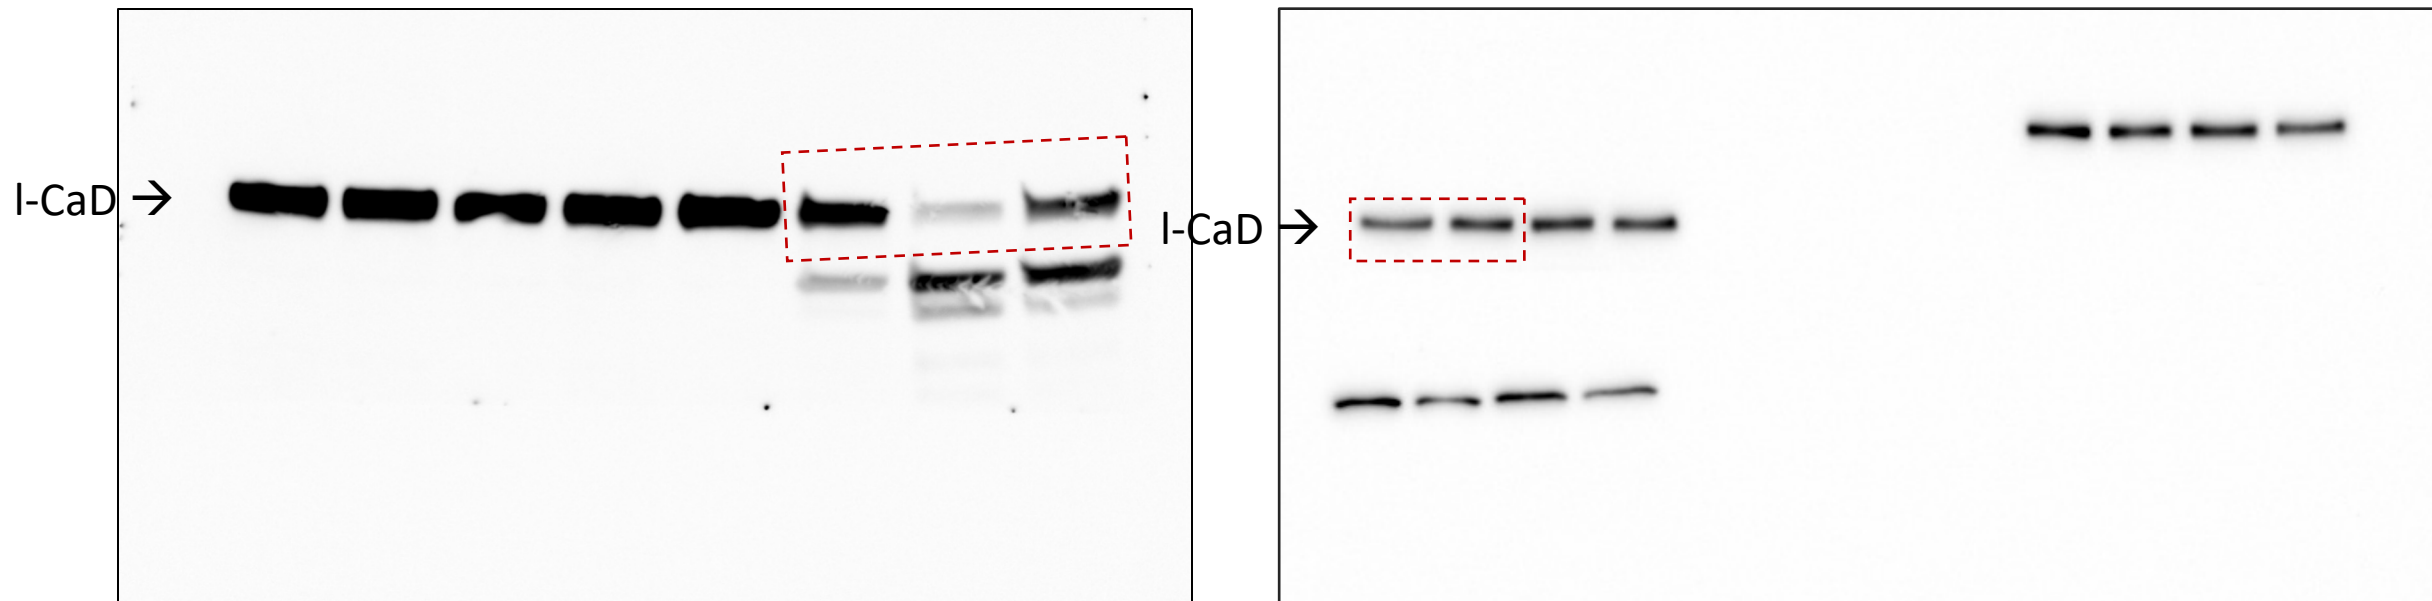

Fig. 5A raw data for Western blot using anti-actin antibody (exps 1/3)

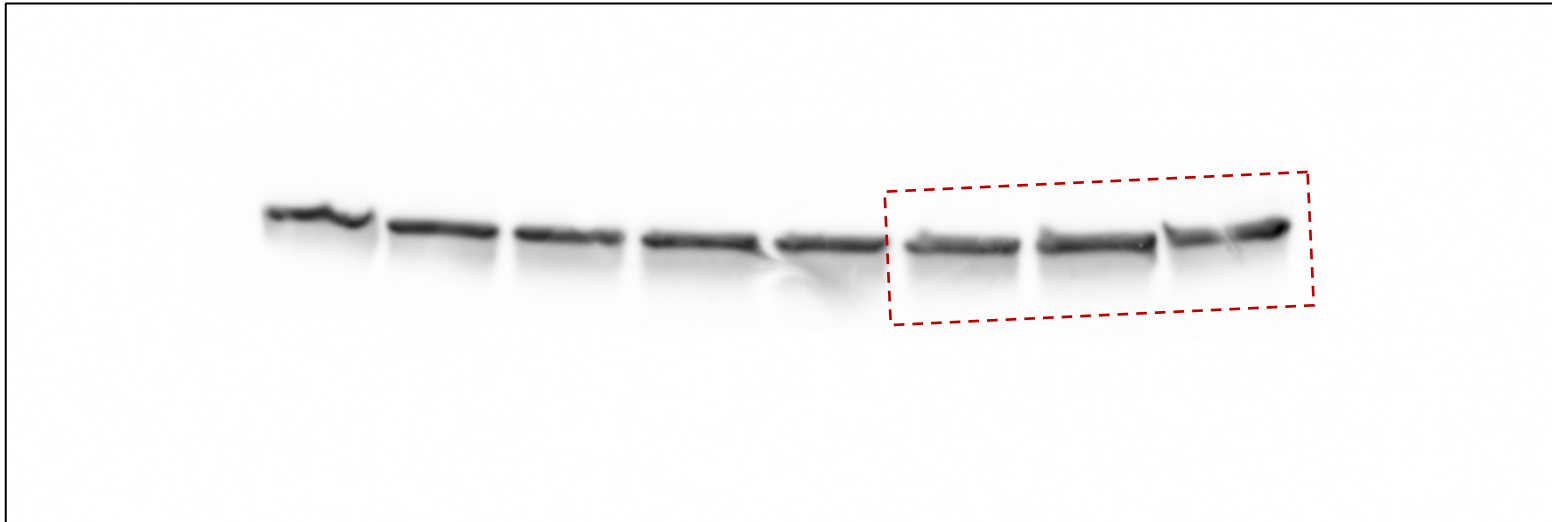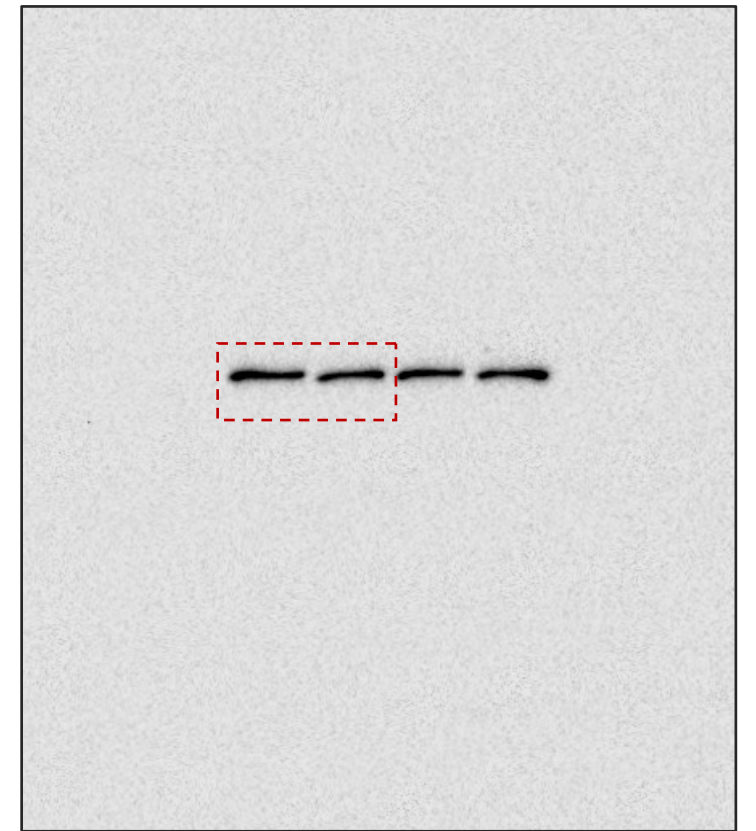

Fig. 5A raw data for Western blot using anti-I-CaD antibody (exps 2/3)

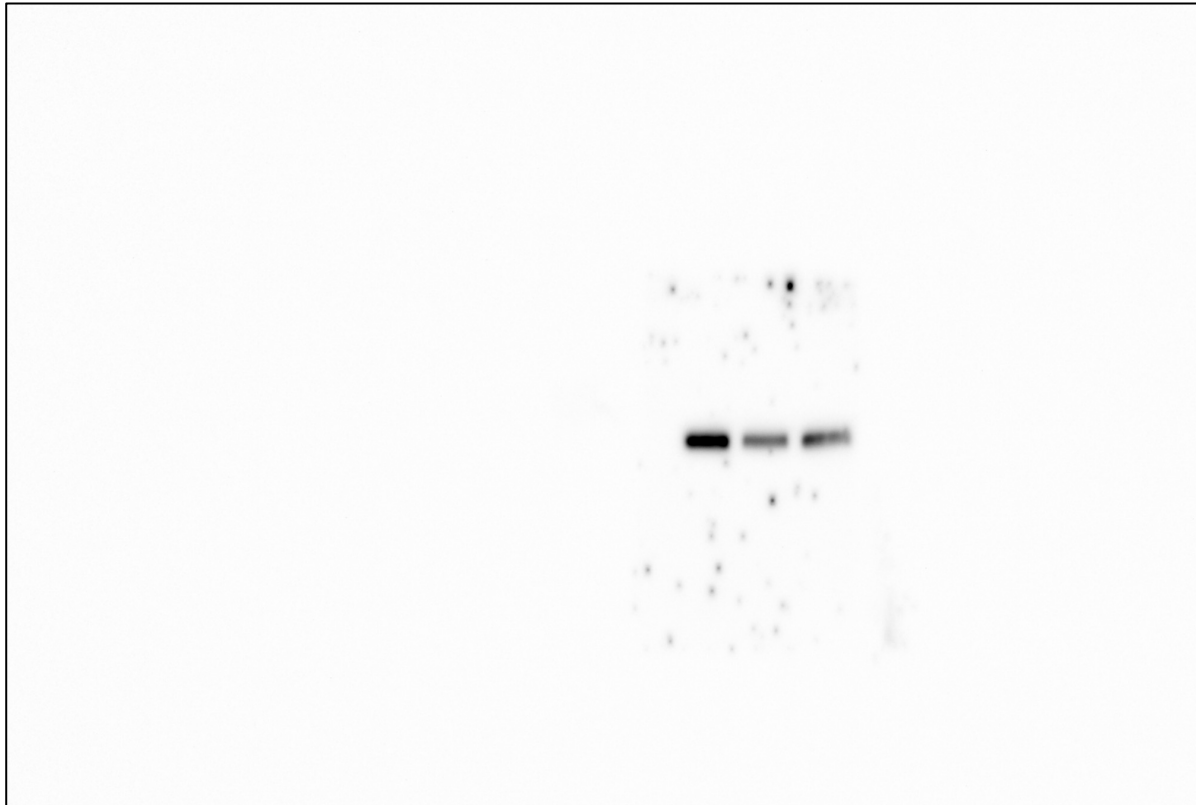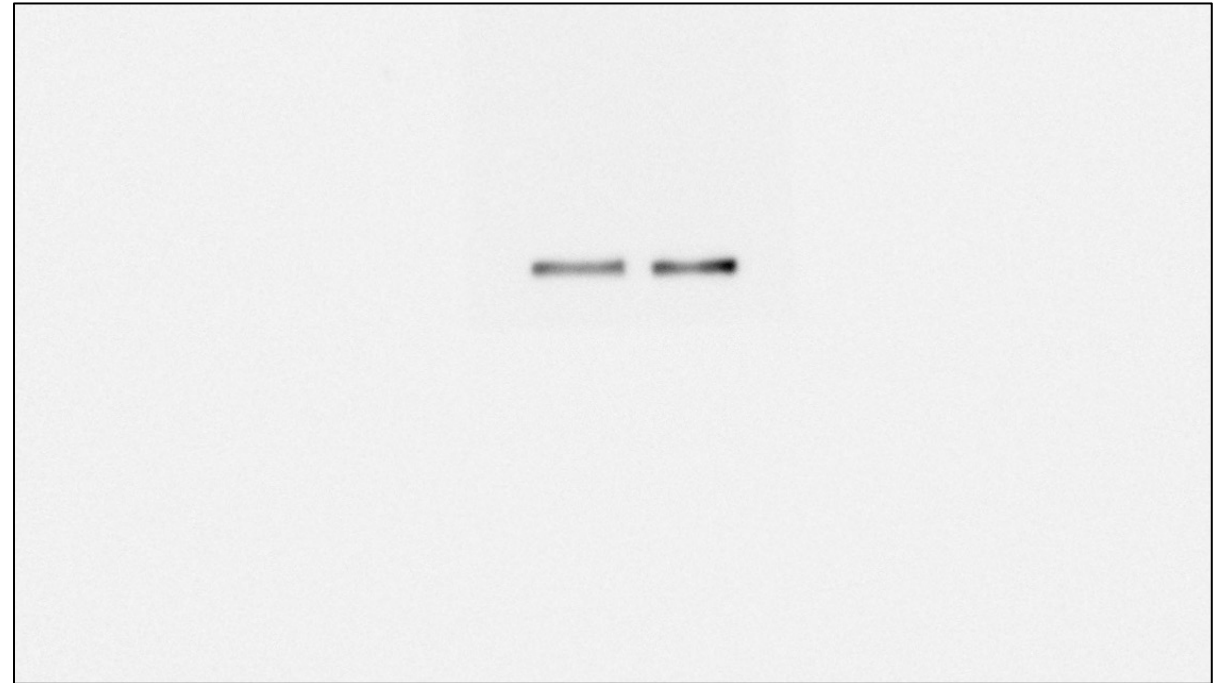

Fig. 5A raw data for Western blot using anti-actin antibody (exps 2/3)

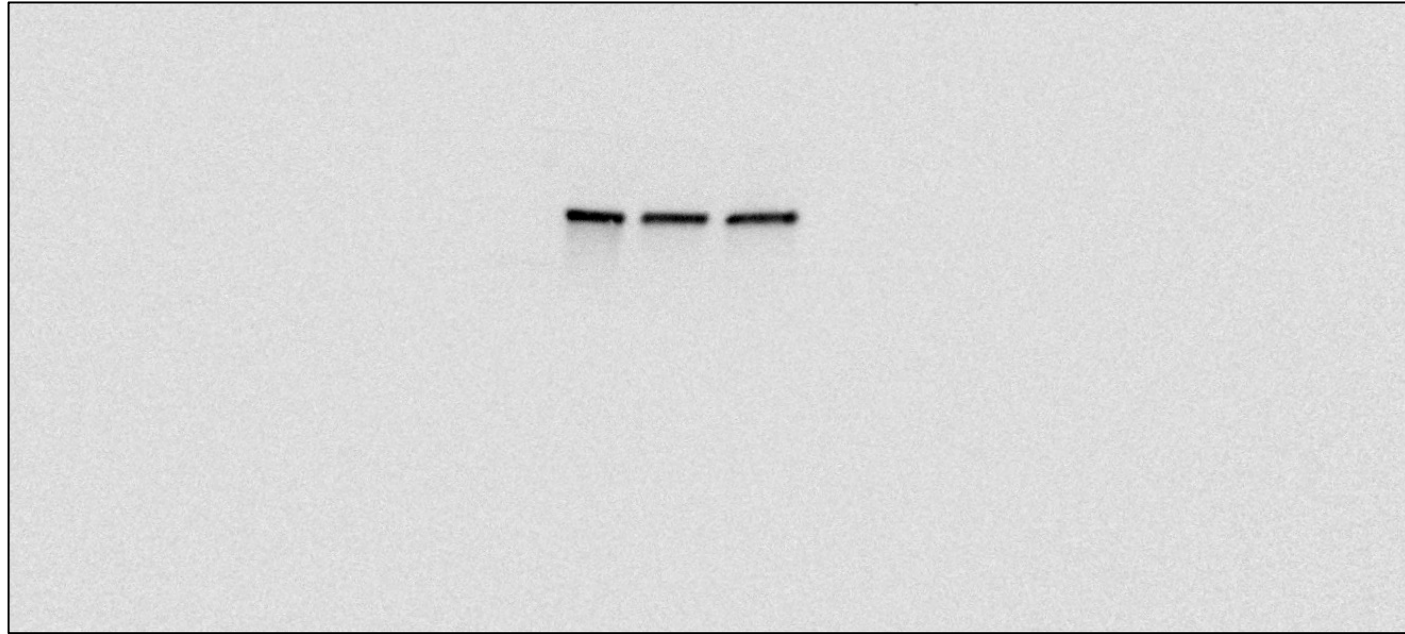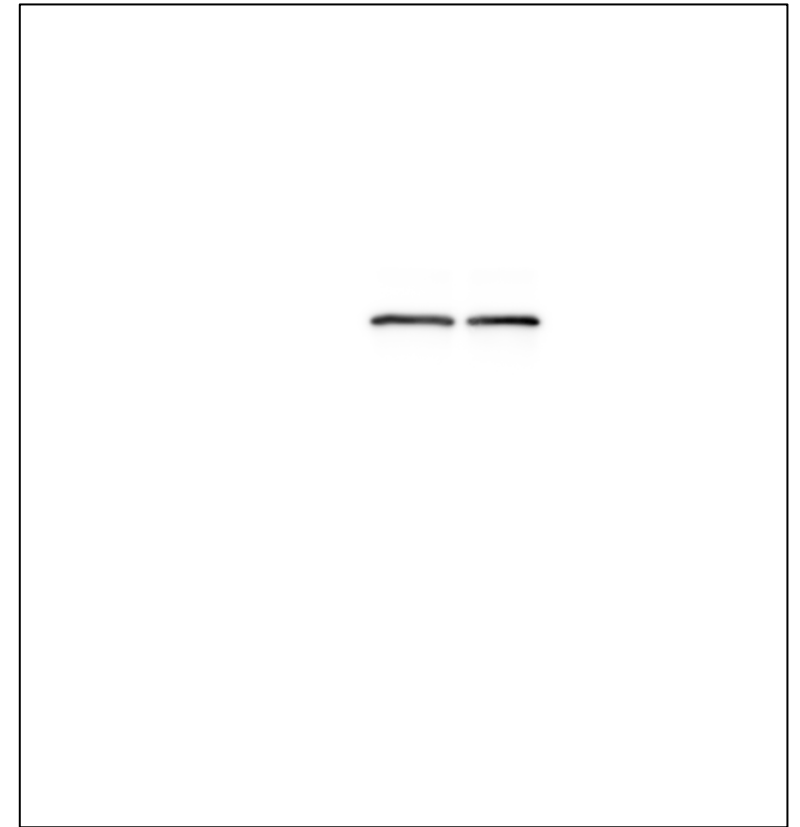

Fig. 5A raw data for Western blot using anti-I-CaD antibody (exps 3/3)

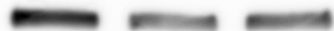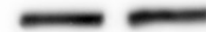

Fig. 5A raw data for Western blot using anti-actin antibody (exps 3/3)

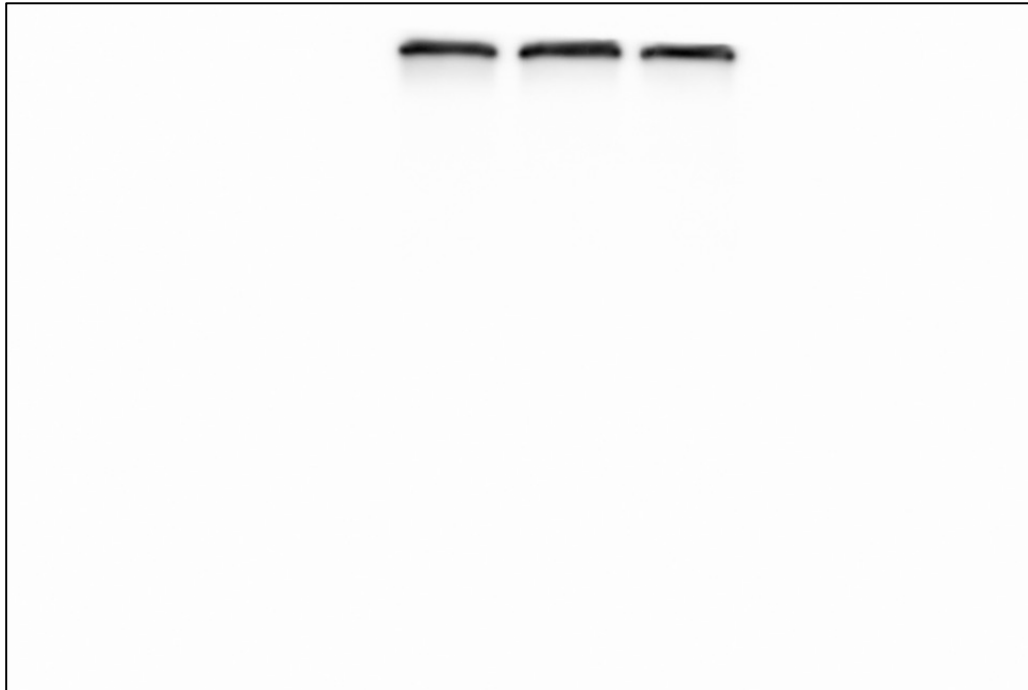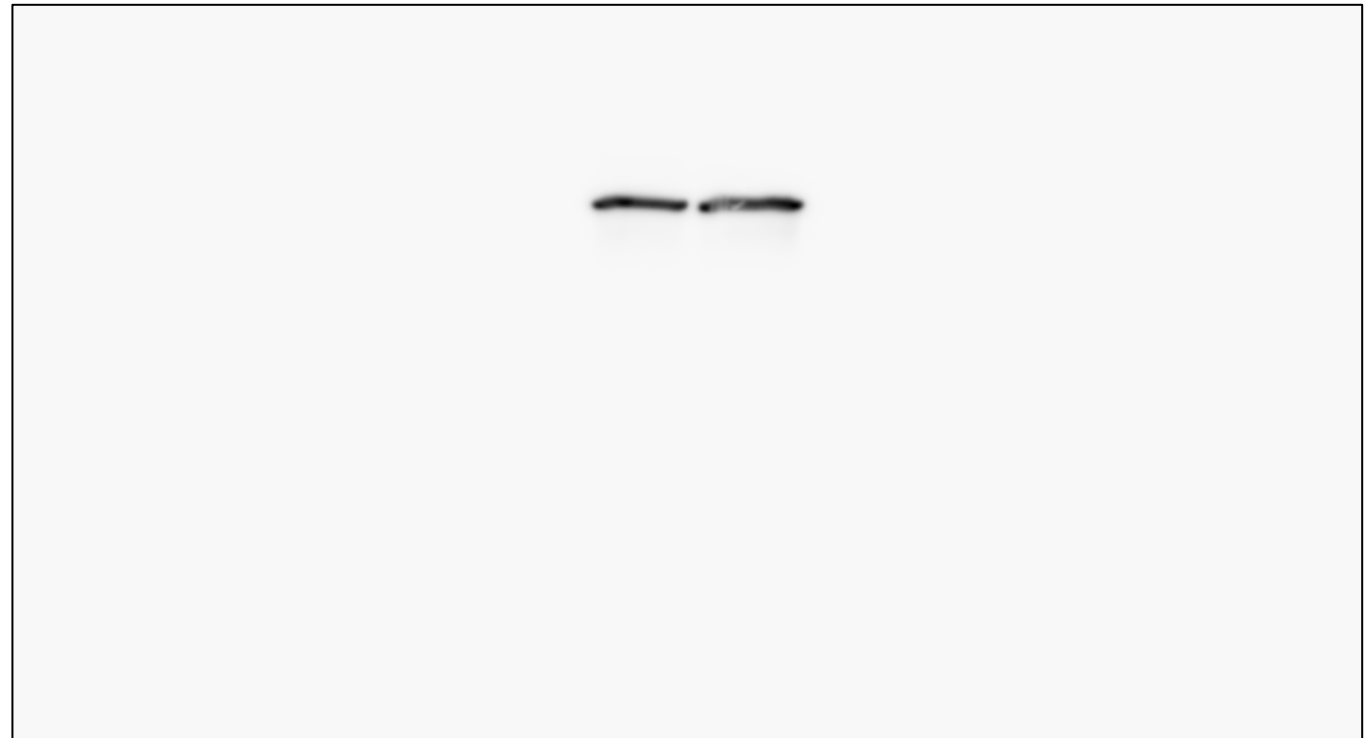

Fig. 5G raw data for Western blot using anti-GR antibody

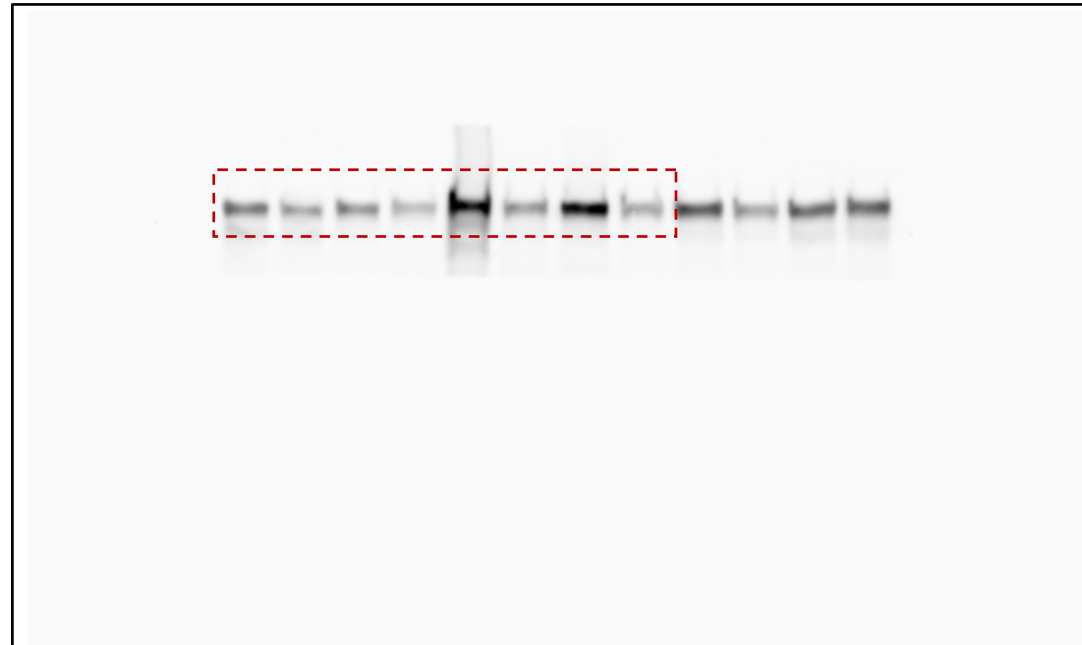

Fig. 5G raw data for Western blot using anti-I-CaD antibody

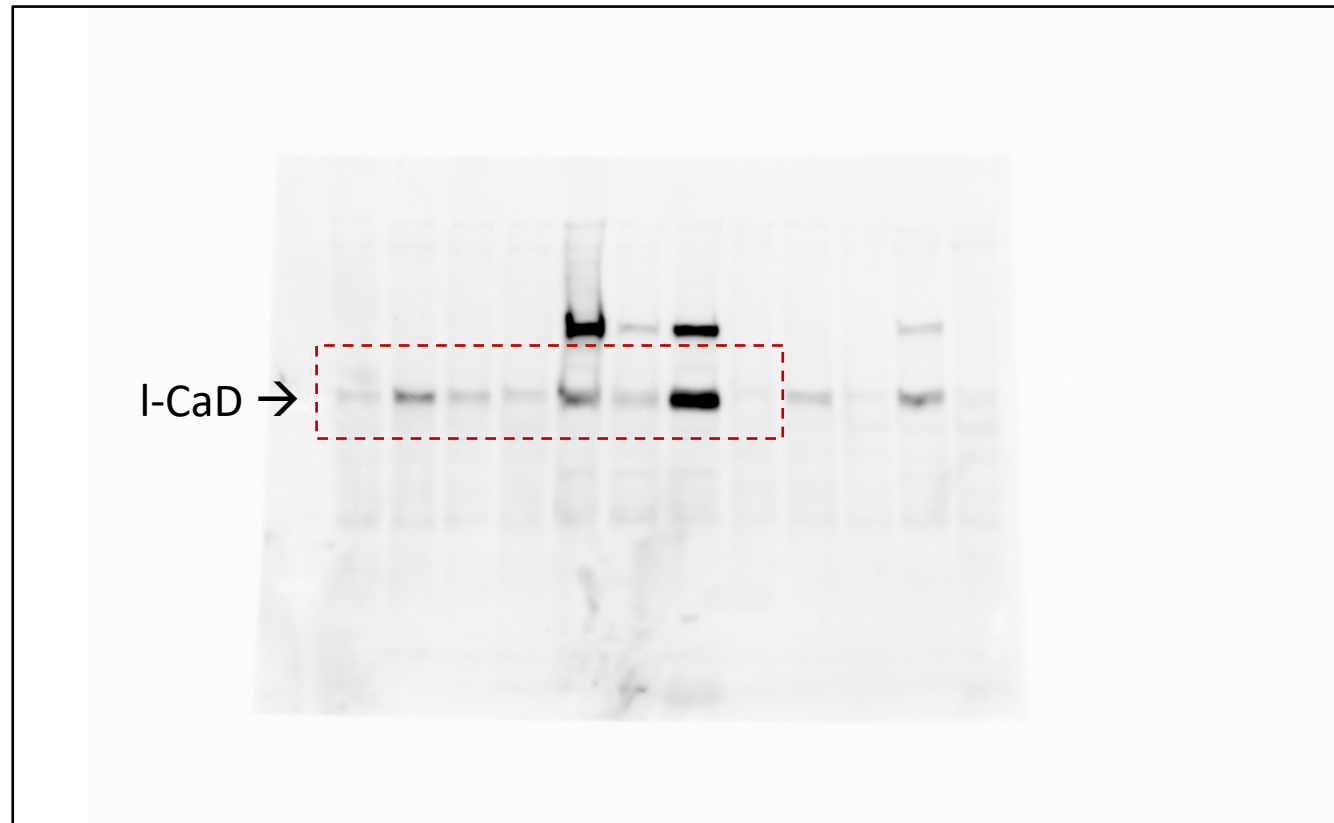



Fig. 5G raw data for Western blot using anti-actin antibody

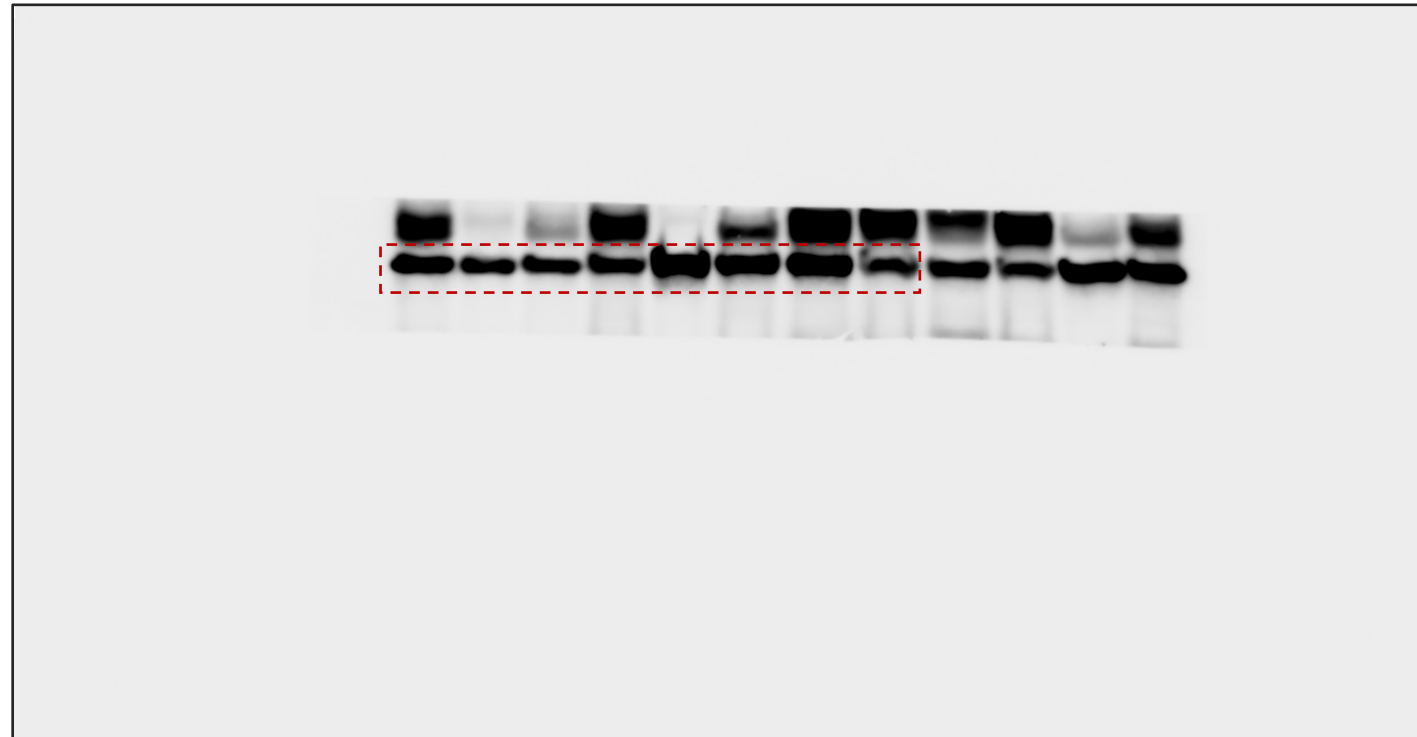

Fig. S4B raw data for Western blot using anti-I-CaD antibody

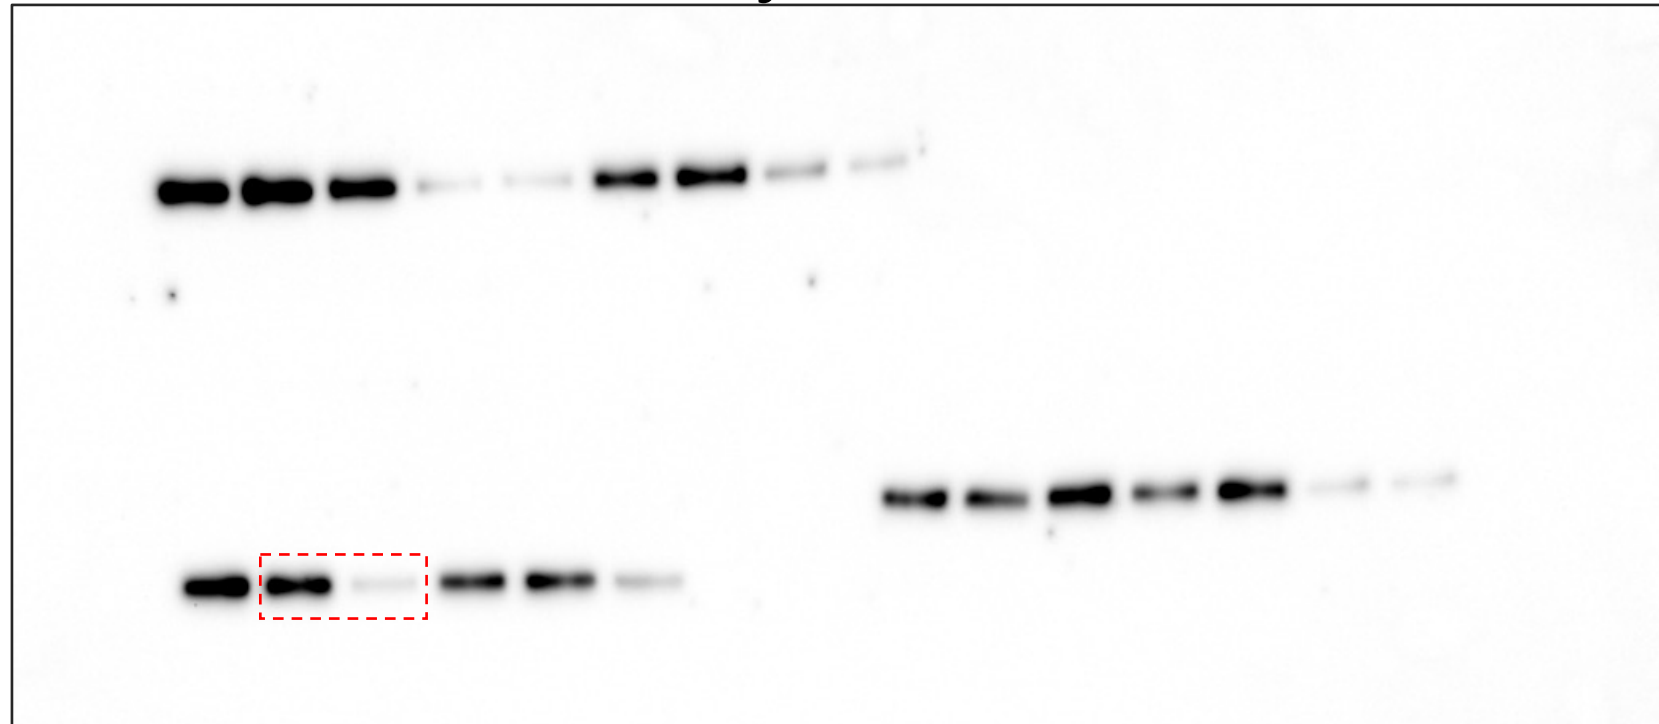

Fig. S4B raw data for Western blot using anti-vinculin antibody

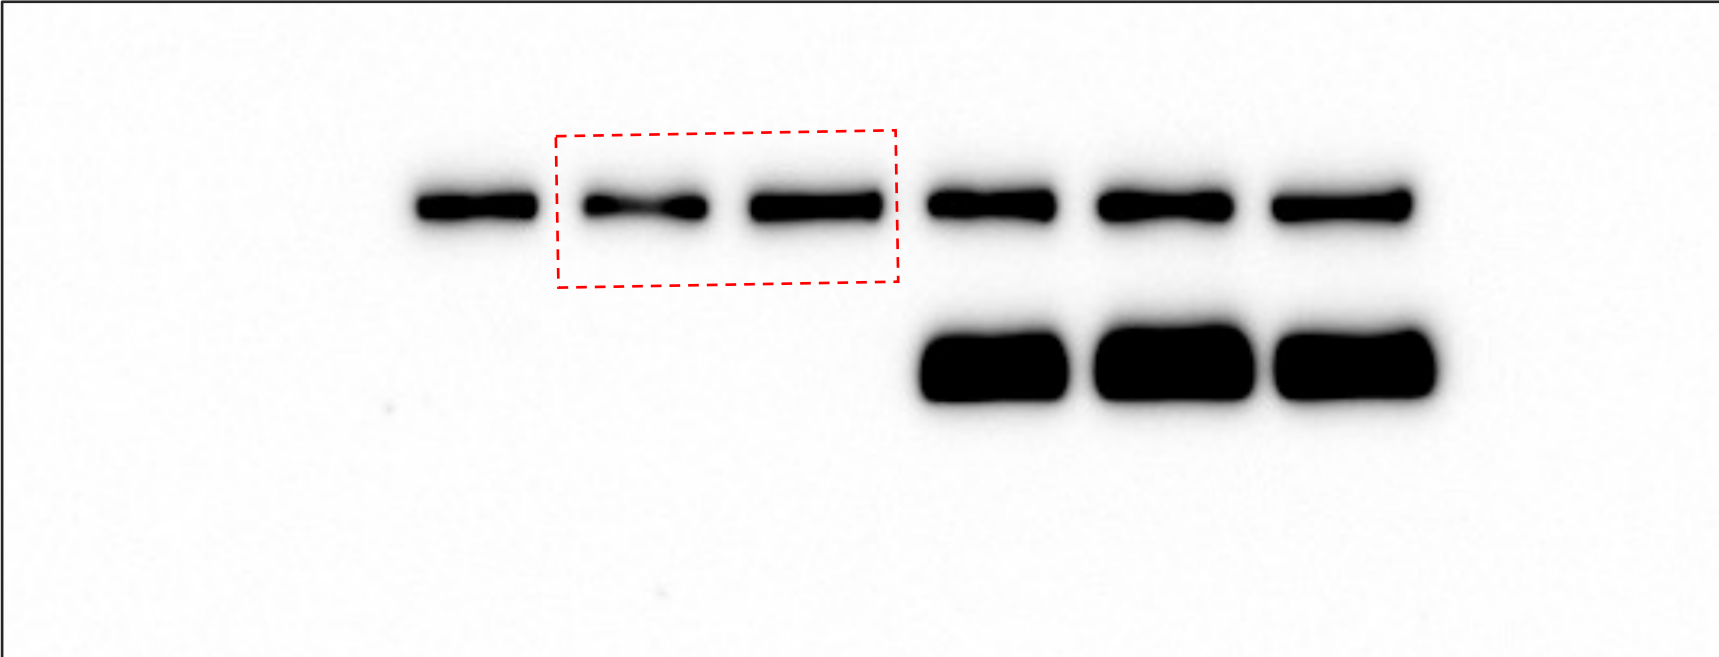

Supplement: 41389_2023_485_MOESM4_ESM.pdf [file 41389_2023_485_MOESM4_ESM.pdf]
