# Supplementary material for: Glucocorticoid receptor-induced non-muscle caldesmon regulates metastasis in castration-resistant prostate cancer
Source: PubMed Central journal article supplement (PMC10423232; doi:10.1038/s41389-023-00485-z), 2023-08-12
Supplement: 41389_2023_485_MOESM2_ESM.pdf [file 41389_2023_485_MOESM2_ESM.pdf]

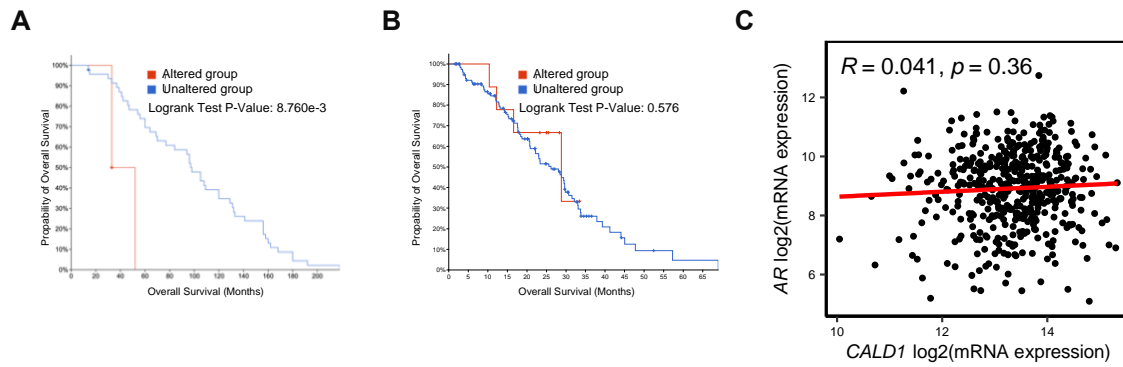

**Supplementary Figure S1. Correlations of *CALD1* alterations and expression with poor prognosis and *AR* in PCa patient data sets.**

(A) Kaplan-Meier overall survival curves between patients with *CALD1* amplifications (n = 2) and unaltered *CALD1* (n = 46) (70).

(B) Kaplan-Meier overall survival curves between patients with *CALD1* alterations (n = 10) and unaltered *CALD1* (n = 118) (68).

(C) Scatterplot depicting the Spearman's rank correlation between *CALD1* and *AR* in TCGA PCa data set.

A

## EPITHELIAL CELL PROLIFERATION

| GOBP_POSITIVE_REGULATION_OF_EPITHELIAL_CELL_PROLIFERATION |           |        |                      | GOBP_NEGATIVE_REGULATION_OF_EPITHELIAL_CELL_PROLIFERATION |            |          |           |          |                      |
|-----------------------------------------------------------|-----------|--------|----------------------|-----------------------------------------------------------|------------|----------|-----------|----------|----------------------|
| ITGB3                                                     | 0.811**** | PKHD1  | 0.202****            | ZNF580                                                    | -0.225**** | CAV1     | 0.79****  | NFIB     | 0.123**              |
| FGF2                                                      | 0.794**** | VASH2  | 0.2****              | HRAS                                                      | -0.246**** | CAV2     | 0.763**** | IFT52    | 0.118**              |
| FZD7                                                      | 0.788**** | PDGFB  | 0.189****            | BAD                                                       | -0.247**** | TGFBR3   | 0.752**** | DUSP10   | 0.112*               |
| CAV7                                                      | 0.763**** | THBS4  | 0.189****            | MYDGF                                                     | -0.255**** | GJA1     | 0.744**** | CDK6     | 0.1*                 |
| NRP2                                                      | 0.763**** | PTPRN  | 0.188****            | SIRT6                                                     | -0.258**** | LIMS2    | 0.703**** | SAV1     | 0.093*               |
| FGFR1                                                     | 0.69****  | HIF1A  | 0.184****            | AKT1                                                      | -0.273**** | WFDC1    | 0.697**** | XDH      | 0.077**              |
| NOG                                                       | 0.659**** | CCR3   | 0.183****            | APLN                                                      | -0.285**** | ISL1     | 0.693**** | IL12B    | 0.064 <sup>ns</sup>  |
| SFRP1                                                     | 0.637**** | NOTCH2 | 0.173***             | EMC10                                                     | -0.291**** | MEF2C    | 0.674**** | WNT5A    | 0.062 <sup>ns</sup>  |
| SCN5A                                                     | 0.63****  | ODAM   | 0.173***             | IQGAP3                                                    | -0.291**** | RGN      | 0.661**** | GHRL     | 0.061 <sup>ns</sup>  |
| FGF7                                                      | 0.627**** | SP1    | 0.171***             | PDCL3                                                     | -0.335**** | SERPINF1 | 0.651**** | DLG1     | 0.048 <sup>ns</sup>  |
| FGF10                                                     | 0.615**** | CYP7B1 | 0.168***             | GATA2                                                     | -0.342**** | MCC      | 0.647**** | SOX9     | 0.046 <sup>ns</sup>  |
| SEMA5A                                                    | 0.597**** | SHH    | 0.166***             | NME2                                                      | -0.356**** | SFRP1    | 0.637**** | AR       | 0.044 <sup>ns</sup>  |
| HTRA1                                                     | 0.593**** | ADAM17 | 0.162***             | ESRP2                                                     | -0.371**** | SULF1    | 0.623**** | MED1     | 0.044 <sup>ns</sup>  |
| JCAD                                                      | 0.593**** | VIP    | 0.151***             | MST1                                                      | -0.373**** | SNAI2    | 0.559**** | SUZ12    | 0.025 <sup>ns</sup>  |
| KDR                                                       | 0.589**** | SCG2   | 0.15**               | SRSF6                                                     | -0.413**** | NR2F2    | 0.555**** | SYNJ2BP  | 0.018 <sup>ns</sup>  |
| YAP1                                                      | 0.579**** | APLNR  | 0.146**              | PDCD6                                                     | -0.424**** | TGFB2    | 0.555**** | GDF2     | 0.012 <sup>ns</sup>  |
| TLR4                                                      | 0.568**** | MMP12  | 0.14**               | NME1                                                      | -0.465**** | FGFR2    | 0.549**** | IL26     | 0.011 <sup>ns</sup>  |
| FGFR2                                                     | 0.549**** | NR4A1  | 0.138**              | HPN                                                       | -0.517**** | ROBO1    | 0.549**** | KRIT1    | 0.009 <sup>ns</sup>  |
| TEK                                                       | 0.545**** | GRN    | 0.135**              |                                                           |            | GDF5     | 0.548**** | INTU     | 0.004 <sup>ns</sup>  |
| STAT5A                                                    | 0.544**** | CCL24  | 0.131**              |                                                           |            | BMP4     | 0.542**** | IFT172   | -0.018 <sup>ns</sup> |
| BMP4                                                      | 0.542**** | RICTOR | 0.13**               |                                                           |            | COL4A3   | 0.515**** | PRL      | -0.018 <sup>ns</sup> |
| ECM1                                                      | 0.531**** | CCL26  | 0.128**              |                                                           |            | SPARC    | 0.5****   | IFT57    | -0.019 <sup>ns</sup> |
| PRKCA                                                     | 0.512**** | EGFL7  | 0.125**              |                                                           |            | DAB2IP   | 0.479**** | SLURP1   | -0.025 <sup>ns</sup> |
| FGF1                                                      | 0.489**** | HMOX1  | 0.116*               |                                                           |            | NGFR     | 0.457**** | APOE     | -0.028 <sup>ns</sup> |
| OSR1                                                      | 0.483**** | F3     | 0.112*               |                                                           |            | SFRP2    | 0.457**** | CPB2     | -0.04 <sup>ns</sup>  |
| CDH3                                                      | 0.476**** | CCL11  | 0.109*               |                                                           |            | GATA3    | 0.441**** | PDCD10   | -0.044 <sup>ns</sup> |
| PIK3CD                                                    | 0.474**** | EPGN   | 0.1*                 |                                                           |            | CD109    | 0.433**** | IFT80    | -0.056 <sup>ns</sup> |
| TP63                                                      | 0.458**** | VEGFB  | 0.1*                 |                                                           |            | PTN      | 0.433**** | MARVELD3 | -0.082 <sup>ns</sup> |
| CXCL12                                                    | 0.454**** | CDC42  | 0.097*               |                                                           |            | TGFB1    | 0.422**** | STRAP    | -0.092*              |
| IGF2                                                      | 0.443**** | CCND1  | 0.092*               |                                                           |            | GPC3     | 0.412**** | TINF2    | -0.101*              |
| NOTCH1                                                    | 0.435**** | NRP1   | 0.089*               |                                                           |            | CDKN2B   | 0.405**** | APOH     | -0.106*              |
| PTN                                                       | 0.433**** | EGF    | 0.086 <sup>ns</sup>  |                                                           |            | TGFB1    | 0.399**** | PBLD     | -0.106*              |
| HYAL1                                                     | 0.43****  | SIRT1  | 0.084 <sup>ns</sup>  |                                                           |            | KLF9     | 0.395**** | WNT10B   | -0.111*              |
| FLT4                                                      | 0.429**** | LACRT  | 0.083 <sup>ns</sup>  |                                                           |            | ATOH8    | 0.389**** | PEX2     | -0.115*              |
| HAS2                                                      | 0.425**** | CRNN   | 0.077 <sup>ns</sup>  |                                                           |            | TNMD     | 0.386**** | AQP11    | -0.127**             |
| LAMB1                                                     | 0.414**** | VEGFD  | 0.071 <sup>ns</sup>  |                                                           |            | FLT1     | 0.375**** | ATP5F1A  | -0.16**              |
| NOD2                                                      | 0.407**** | REG3G  | 0.068 <sup>ns</sup>  |                                                           |            | THBS1    | 0.361**** | NUPR1    | -0.184****           |
| TGFBR1                                                    | 0.399**** | WNT5A  | 0.062 <sup>ns</sup>  |                                                           |            | CEACAM1  | 0.359**** | NKX3-1   | -0.194****           |
| TNFAIP3                                                   | 0.394**** | GHRL   | 0.061 <sup>ns</sup>  |                                                           |            | DLL4     | 0.338**** | MAGED1   | -0.219****           |
| OSR2                                                      | 0.389**** | VEGFA  | 0.056 <sup>ns</sup>  |                                                           |            | SOX2     | 0.333**** | PHB2     | -0.228****           |
| B4GALT1                                                   | 0.368**** | PLCG1  | 0.055 <sup>ns</sup>  |                                                           |            | MTSS1    | 0.326**** | STK11    | -0.232****           |
| PGF                                                       | 0.366**** | MTOR   | 0.052 <sup>ns</sup>  |                                                           |            | KRT4     | 0.325**** | IFT74    | -0.251****           |
| PROX1                                                     | 0.366**** | SOX9   | 0.046 <sup>ns</sup>  |                                                           |            | B2M      | 0.294**** | AIMP1    | -0.306****           |
| TGM1                                                      | 0.366**** | AR     | 0.044 <sup>ns</sup>  |                                                           |            | RGCC     | 0.287**** | WDR13    | -0.317****           |
| ITGA4                                                     | 0.361**** | MED1   | 0.044 <sup>ns</sup>  |                                                           |            | PPARG    | 0.282**** | ATP5IF1  | -0.365****           |
| RPTOR                                                     | 0.359**** | ZNF304 | 0.043 <sup>ns</sup>  |                                                           |            | PTEN     | 0.276**** | WDR77    | -0.396****           |
| JAML                                                      | 0.354**** | MAP2K5 | 0.04 <sup>ns</sup>   |                                                           |            | IL12A    | 0.274**** | KDF1     | -0.485****           |
| WNT3A                                                     | 0.351**** | ATP7A  | 0.038 <sup>ns</sup>  |                                                           |            | RUNX3    | 0.274**** | HPN      | -0.517****           |
| BMPR2                                                     | 0.349**** | ZNF703 | 0.037 <sup>ns</sup>  |                                                           |            | CDKN1C   | 0.271**** |          |                      |
| TGFA                                                      | 0.349**** | RREB1  | 0.033 <sup>ns</sup>  |                                                           |            | NF1      | 0.252**** |          |                      |
| EGFR                                                      | 0.343**** | REG3A  | 0.026 <sup>ns</sup>  |                                                           |            | CCL2     | 0.25****  |          |                      |
| TNFSF12                                                   | 0.341**** | ARG1   | 0.022 <sup>ns</sup>  |                                                           |            | EREG     | 0.244**** |          |                      |
| WNT2                                                      | 0.324**** | PRKD1  | 0.018 <sup>ns</sup>  |                                                           |            | VASH1    | 0.24****  |          |                      |
| CDH13                                                     | 0.32****  | GDF2   | 0.012 <sup>ns</sup>  |                                                           |            | PTPRK    | 0.225**** |          |                      |
| STXBP4                                                    | 0.319**** | GHSR   | 0.01 <sup>ns</sup>   |                                                           |            | CNMD     | 0.222**** |          |                      |
| ID1                                                       | 0.315**** | SMO    | 0.009 <sup>ns</sup>  |                                                           |            | TNF      | 0.217**** |          |                      |
| FGF9                                                      | 0.313**** | AGGF1  | 0.008 <sup>ns</sup>  |                                                           |            | VDR      | 0.204**** |          |                      |
| PPP1R16B                                                  | 0.305**** | DLX5   | 0.003 <sup>ns</sup>  |                                                           |            | ATF2     | 0.196**** |          |                      |
| BMP2                                                      | 0.304**** | DLX6   | 0.001 <sup>ns</sup>  |                                                           |            | ALOX5    | 0.191**** |          |                      |
| CLDN1                                                     | 0.303**** | MDK    | 0 <sup>ns</sup>      |                                                           |            | RB1      | 0.189**** |          |                      |
| ARNT                                                      | 0.299**** | NRAS   | 0 <sup>ns</sup>      |                                                           |            | NLRC3    | 0.186**** |          |                      |
| AKT3                                                      | 0.294**** | IHH    | -0.004 <sup>ns</sup> |                                                           |            | A4GNT    | 0.183**** |          |                      |
| WDR48                                                     | 0.292**** | LRG1   | -0.004 <sup>ns</sup> |                                                           |            | PTPRM    | 0.183**** |          |                      |
| BMPR1A                                                    | 0.288**** | PDPK1  | -0.018 <sup>ns</sup> |                                                           |            | SFN      | 0.169**** |          |                      |
| NR4A3                                                     | 0.28****  | XBP1   | -0.027 <sup>ns</sup> |                                                           |            | PPARD    | 0.164**** |          |                      |
| CFLAR                                                     | 0.278**** | PRKD2  | -0.047 <sup>ns</sup> |                                                           |            | STAT1    | 0.163**** |          |                      |
| FGFBP1                                                    | 0.277**** | REG1A  | -0.05 <sup>ns</sup>  |                                                           |            | PTCH1    | 0.161**** |          |                      |
| GPBAR1                                                    | 0.272**** | SOX11  | -0.057 <sup>ns</sup> |                                                           |            | EPPK1    | 0.151**** |          |                      |
| RTN4                                                      | 0.265**** | HMGB2  | -0.061 <sup>ns</sup> |                                                           |            | SCG2     | 0.15**    |          |                      |
| ANG                                                       | 0.251**** | ERBB2  | -0.067 <sup>ns</sup> |                                                           |            | BRCA2    | 0.148**   |          |                      |
| LAMC1                                                     | 0.25****  | HMGB1  | -0.082 <sup>ns</sup> |                                                           |            | NKX2-8   | 0.146**   |          |                      |
| WNT7A                                                     | 0.25****  | KDM5B  | -0.085 <sup>ns</sup> |                                                           |            | CDC73    | 0.143**   |          |                      |
| C5AR2                                                     | 0.247**** | BMP6   | -0.093*              |                                                           |            | CASK     | 0.142**   |          |                      |
| IGF1                                                      | 0.245**** | AGTR1  | -0.096*              |                                                           |            | FBXW7    | 0.123**   |          |                      |
| VEGFC                                                     | 0.24****  | PAX2   | -0.122**             |                                                           |            |          |           |          |                      |
| TCF7L2                                                    | 0.232**** | ZBED9  | -0.137**             |                                                           |            |          |           |          |                      |
| NODAL                                                     | 0.226**** | TWIST1 | -0.138**             |                                                           |            |          |           |          |                      |
| EGR3                                                      | 0.225**** | MST1L  | -0.142**             |                                                           |            |          |           |          |                      |
| C5AR1                                                     | 0.218**** | TBX1   | -0.145**             |                                                           |            |          |           |          |                      |
| BMP5                                                      | 0.217**** | FOXE3  | -0.156***            |                                                           |            |          |           |          |                      |
| AREG                                                      | 0.213**** | NRARP  | -0.169***            |                                                           |            |          |           |          |                      |
| IL10                                                      | 0.208**** | MYC    | -0.183****           |                                                           |            |          |           |          |                      |
| HTR2B                                                     | 0.205**** | PLXNB3 | -0.218****           |                                                           |            |          |           |          |                      |

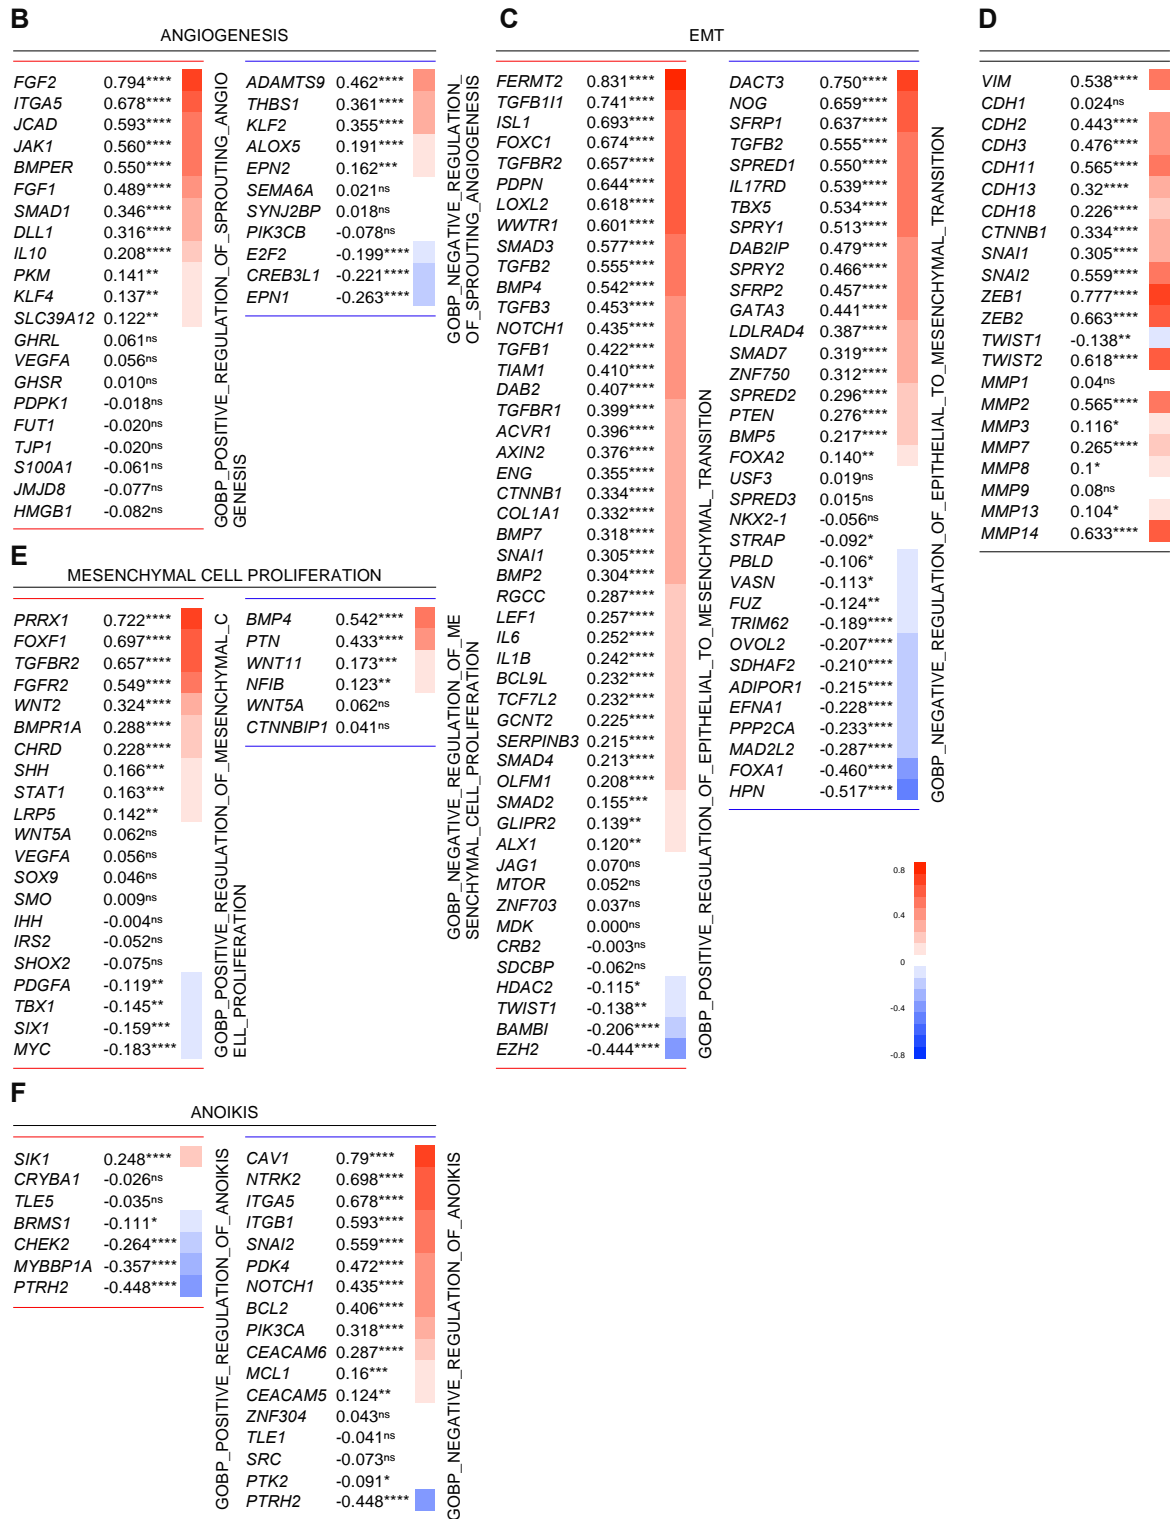

**Supplementary Figure S2. Co-expression between *CALD1* and regulators of proliferation, angiogenesis, EMT, and anoikis in the prostate TCGA data set.**

(A) List of transcripts from the Gene Ontology: Biological Processes gene set for positive and negative regulators of epithelial cell proliferation sorted according to Spearman's correlation values.

(B) List of transcripts from the Gene Ontology: Biological Processes gene set for positive and negative regulators of angiogenesis sorted according to Spearman's correlation values.

(C) List of transcripts from the Gene Ontology: Biological Processes gene set for positive and negative regulators of EMT sorted according to Spearman's correlation values.

(D) A custom list featuring markers associated with epithelial and markers associated with mesenchymal cell phenotype.

(E) List of transcripts from the Gene Ontology: Biological Processes gene set for positive and negative regulators of mesenchymal cell proliferation sorted according to Spearman's correlation values.

(F) List of transcripts from the Gene Ontology: Biological Processes gene set for positive and negative regulators of anoikis sorted according to Spearman's correlation values.

Spearman's rank correlation coefficient presented as numbers and significance indicated by asterisks (ns = not significant, \* $p < 0.05$ , \*\* $p < 0.01$ , \*\*\*  $p < 0.001$ , and \*\*\*\* $p < 0.0001$  as obtained using cBioPortal v4.1.9).



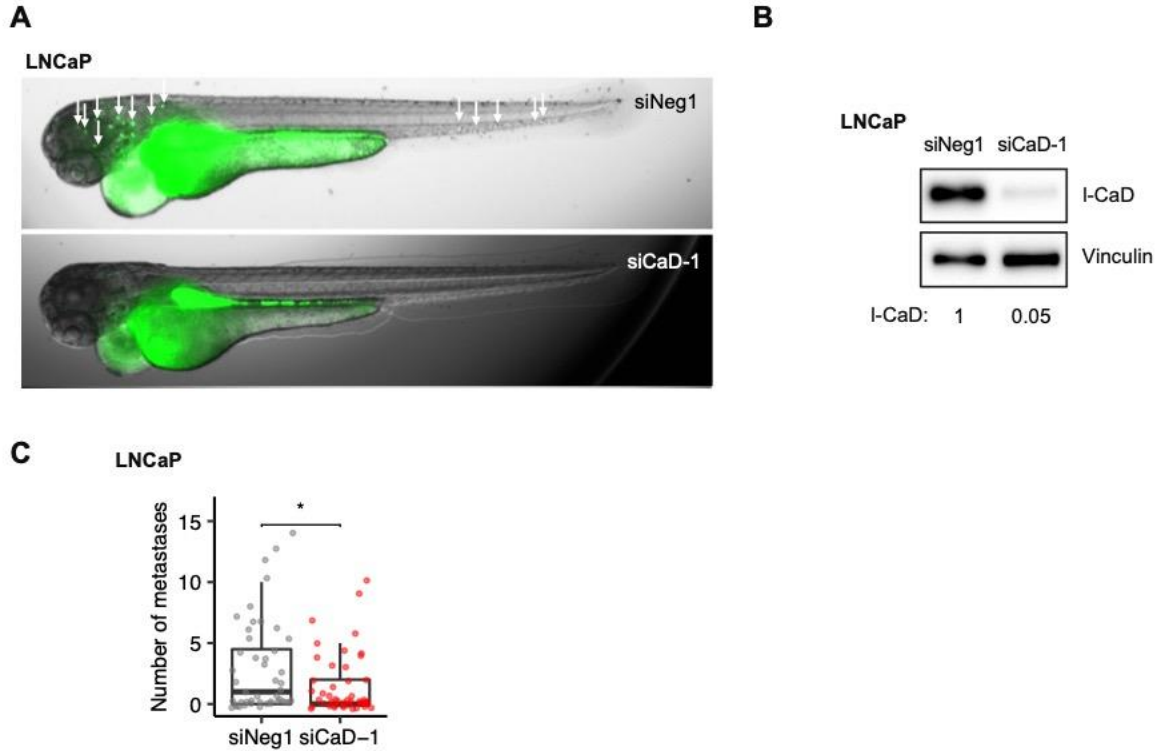

**Supplementary figure S4. I-CaD knockdown impairs metastatic potential of LNCaP cells injected into zebrafish.**

(A) Representative brightfield and fluorescent merge images of zebrafish embryos 1 day after microinjection of CellTracker Green labeled LNCaP cells transfected with siNeg1 or siCaD-1 to the common cardinal vein. Metastases are indicated with arrows.

(B) Expression levels of I-CaD in LNCaP cells transfected with siNeg1 or siCaD-1 48 h after transfection were analyzed by Western blotting using an anti-CaD antibody and loading was controlled using anti-vinculin.

(C) Box and jitter plots depicting the number of metastases in zebrafish embryos ( $n = 96$ ). Boxplot indicates median, and whiskers indicate 1.5 times interquartile range (\*  $p < 0.05$  as determined by  $t$ -test).

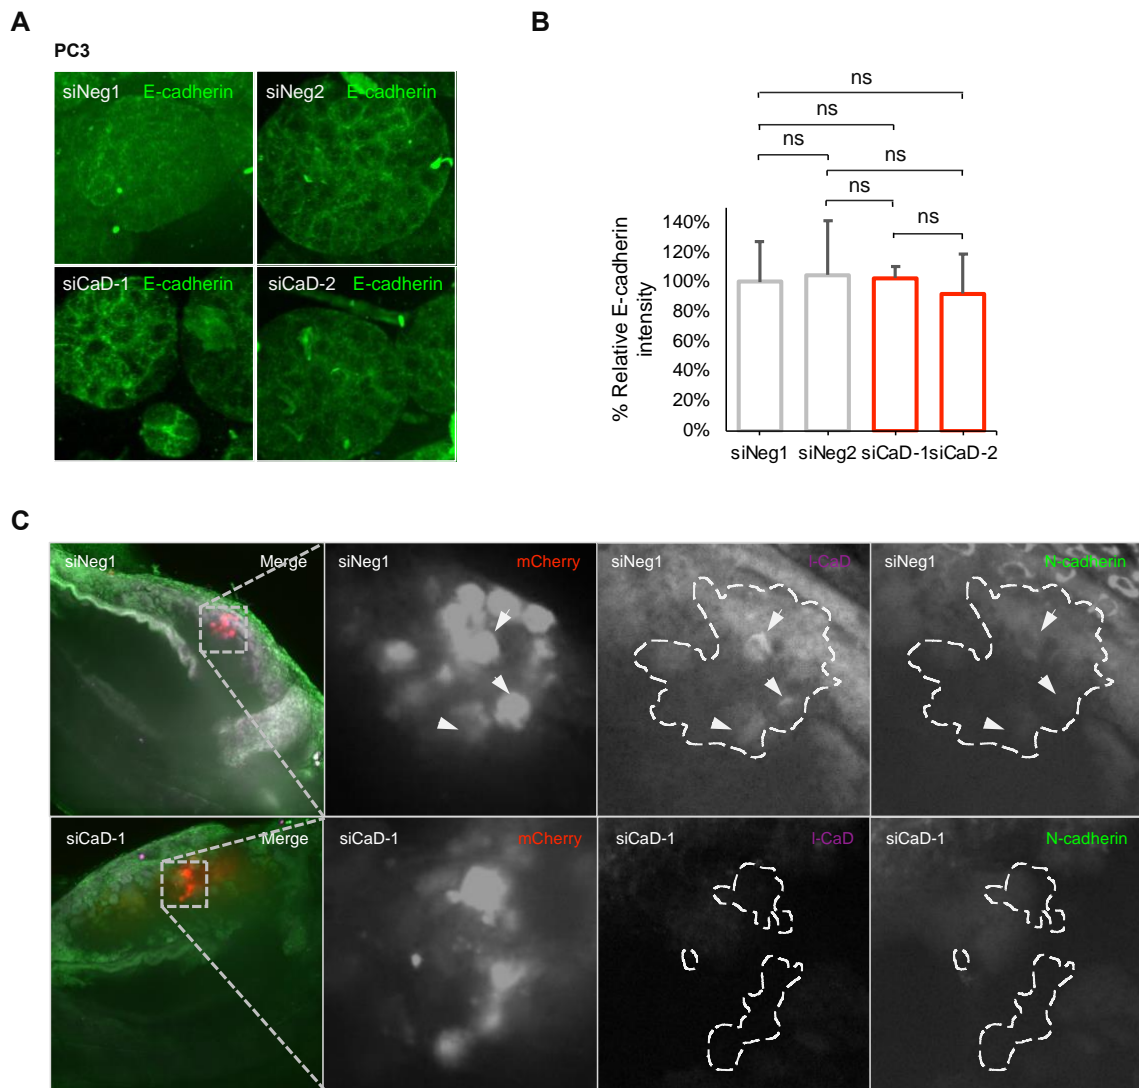

**Supplementary Figure S5. E-cadherin expression in PC3 cell spheroids after l-CaD knockdown *in vitro* and N-cadherin expression in mCherry PC3 cell primary tumors after l-CaD knockdown in zebrafish xenografts *in vivo*.**

(A) Representative fluorescent images of PC3 spheroids transfected with siNeg1, siNeg2, or siCaD-1, siCaD-2, stained with E-cadherin, and counterstained with DAPI.

(B) Barplots depicting E-cadherin protein intensity in spheroids formed by transfected PC3 cells shown in figure A. Average was calculated from multiple individual spheroids (N = 25) measured for mean intensity. The mean and SD are shown (ns = not significant as determined by *t*-test).

(C) Representative fluorescent images of primary tumors formed in zebrafish yolks from injected PC3 cells transfected with siNeg1 or siCaD-1 stained for l-CaD and N-cadherin. Merge image shows the primary tumor in the yolk sac of the zebrafish.

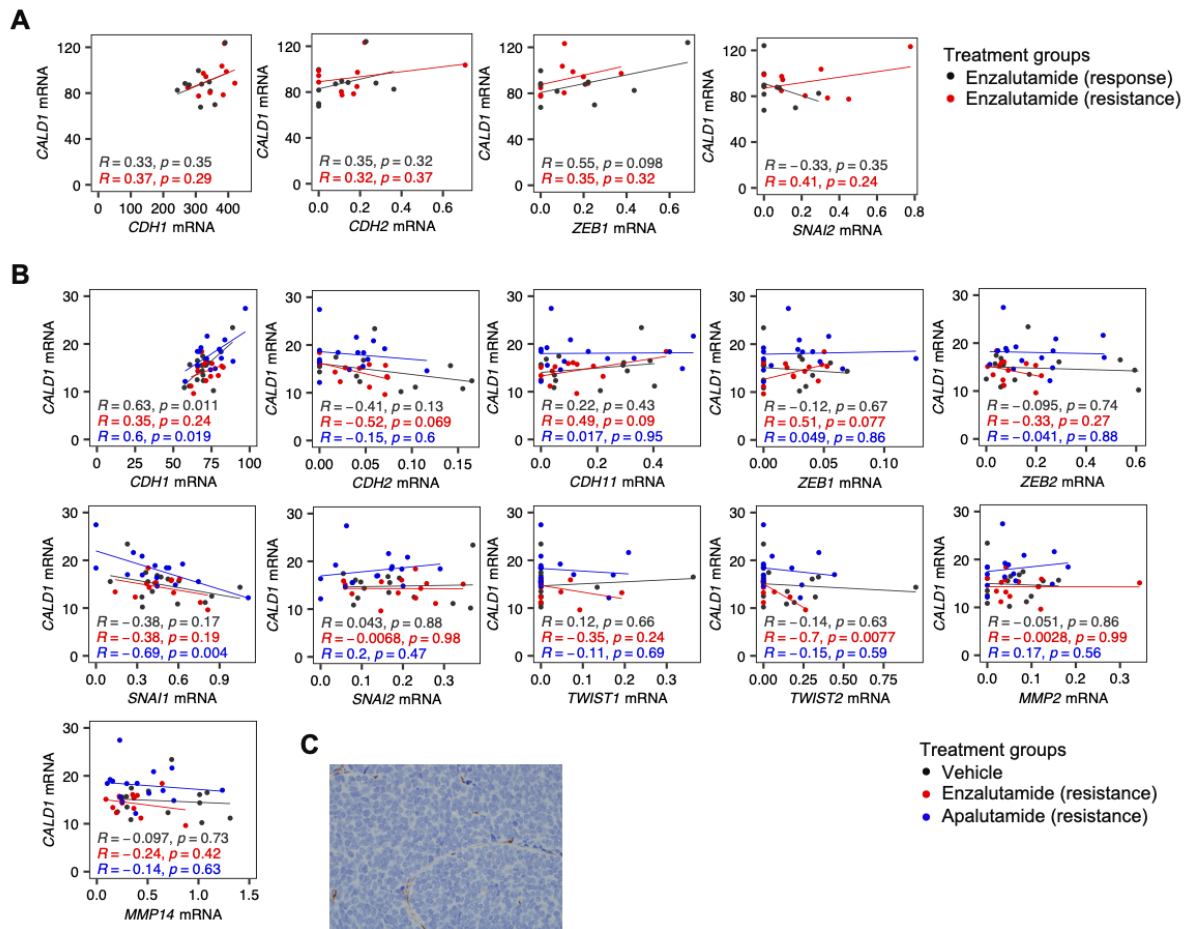

**Supplementary Figure S6. EMT-related marker expression in VCaP xenograft mouse models.**

- (A) Scatterplots depicting the correlation between *CALD1* and EMT marker mRNAs from enzalutamide-treated VCaP xenograft mice.
- (B) Scatterplots depicting the correlation between *CALD1* and EMT marker mRNAs from vehicle-, enzalutamide- and apalutamide-treated VCaP xenograft mice.
- (C) Representative IHC staining of vimentin from a castration-resistant subcutaneous VCaP xenograft mouse resistant to enzalutamide.
