# Supplementary material for: Glucocorticoid receptor-induced non-muscle caldesmon regulates metastasis in castration-resistant prostate cancer
Source: PubMed Central journal article supplement (PMC10423232; doi:10.1038/s41389-023-00485-z), 2023-08-12
Supplement: 41389_2023_485_MOESM3_ESM.pdf [file 41389_2023_485_MOESM3_ESM.pdf]

**Supplementary Table 1. Co-expression analysis between *CALDI* and regulators of cancer hallmarks, actin-related processes and relevant signaling pathways (MSigDB, Gene Ontology: Biological Processes) in the PCa TCGA data set.**

The percentage of positively (Spearman's rank correlation coefficient > 0.3) and negatively (Spearman's rank correlation coefficient < -0.3) co-expressed mRNAs in the gene sets.

| GOBP_POSITIVE_REGULATION_OF_                             | Positive correlation | Negative correlation |
|----------------------------------------------------------|----------------------|----------------------|
| EPITHELIAL_TO_MESENCHYMAL_TRANSITION                     | 52.1 %               | 2.1 %                |
| NON_CANONICAL_WNT_SIGNALING_PATHWAY                      | 46.7 %               | 6.7 %                |
| ACTIN_FILAMENT_DEPOLYMERIZATION                          | 46.2 %               | 7.7 %                |
| CELL_CELL_ADHESION_MEDIATED_BY_CADHERIN                  | 45.5 %               | 9.1 %                |
| TRANSFORMING_GROWTH_FACTOR_BETA_PRODUCTION               | 45.0 %               | 0.0 %                |
| TRANSFORMING_GROWTH_FACTOR_BETA1_PRODUCTION              | 42.9 %               | 0.0 %                |
| CELL_JUNCTION_ASSEMBLY                                   | 39.8 %               | 2.9 %                |
| ACTIN_FILAMENT_BUNDLE_ASSEMBLY                           | 39.3 %               | 0.0 %                |
| SPROUTING_ANGIOGENESIS                                   | 38.1 %               | 0.0 %                |
| CANONICAL_WNT_SIGNALING_PATHWAY                          | 35.0 %               | 5.8 %                |
| CELL_ADHESION_MEDIATED_BY_INTEGRIN                       | 33.3 %               | 4.8 %                |
| CELL_ADHESION                                            | 33.3 %               | 3.2 %                |
| CYTOSKELETON_REORGANIZATION                              | 33.0 %               | 5.2 %                |
| EPITHELIAL_CELL_PROLIFERATION                            | 32.6 %               | 4.9 %                |
| CELL_CELL_ADHESION                                       | 29.9 %               | 3.8 %                |
| ACTIN_FILAMENT_POLYMERIZATION                            | 28.3 %               | 3.8 %                |
| WNT_SIGNALING_PATHWAY                                    | 27.8 %               | 11.9 %               |
| CELL_GROWTH                                              | 23.9 %               | 8.0 %                |
| MESENCHYMAL_CELL_PROLIFERATION                           | 23.8 %               | 0.0 %                |
| CELL_DEATH                                               | 21.2 %               | 6.8 %                |
| APOPTOTIC_SIGNALING_PATHWAY                              | 19.8 %               | 8.7 %                |
| ACTIN_NUCLEATION                                         | 18.8 %               | 6.3 %                |
| INTRACELLULAR_STEROID_HORMONE_RECEPTOR_SIGNALING_PATHWAY | 16.7 %               | 25.0 %               |
| ANOIKIS                                                  | 0.0 %                | 28.6 %               |

| GOBP_NEGATIVE_REGULATION_OF_                             | Positive correlation | Negative correlation |
|----------------------------------------------------------|----------------------|----------------------|
| ACTIN_NUCLEATION                                         | 0.0 %                | 11.1 %               |
| CELL_CELL_ADHESION_MEDIATED_BY_CADHERIN                  | 20.0 %               | 10.0 %               |
| APOPTOTIC_SIGNALING_PATHWAY                              | 19.5 %               | 6.3 %                |
| CELL_DEATH                                               | 22.0 %               | 6.2 %                |
| ANOIKIS                                                  | 52.9 %               | 5.9 %                |
| CYTOSKELETON_ORGANIZATION                                | 30.5 %               | 5.8 %                |
| EPITHELIAL_TO_MESENCHYMAL_TRANSITION                     | 42.9 %               | 5.7 %                |
| INTRACELLULAR_STEROID_HORMONE_RECEPTOR_SIGNALING_PATHWAY | 25.7 %               | 5.7 %                |
| EPITHELIAL_CELL_PROLIFERATION                            | 34.4 %               | 4.9 %                |
| CELL_ADHESION                                            | 32.5 %               | 3.9 %                |
| CELL_GROWTH                                              | 26.9 %               | 3.8 %                |
| CELL_CELL_ADHESION                                       | 26.6 %               | 3.5 %                |
| ACTIN_FILAMENT_BUNDLE_ASSEMBLY                           | 38.7 %               | 3.2 %                |
| CELL_JUNCTION_ASSEMBLY                                   | 46.9 %               | 3.1 %                |
| WNT_SIGNALING_PATHWAY                                    | 36.4 %               | 3.0 %                |
| ACTIN_FILAMENT_DEPOLYMERIZATION                          | 39.5 %               | 2.3 %                |
| CANONICAL_WNT_SIGNALING_PATHWAY                          | 38.6 %               | 2.3 %                |
| ACTIN_FILAMENT_POLYMERIZATION                            | 32.8 %               | 1.6 %                |
| NON_CANONICAL_WNT_SIGNALING_PATHWAY                      | 60.0 %               | 0.0 %                |
| CELL_ADHESION_MEDIATED_BY_INTEGRIN                       | 33.3 %               | 0.0 %                |
| MESENCHYMAL_CELL_PROLIFERATION                           | 33.3 %               | 0.0 %                |
| TRANSFORMING_GROWTH_FACTOR_BETA_PRODUCTION               | 30.8 %               | 0.0 %                |
| SPROUTING_ANGIOGENESIS                                   | 27.3 %               | 0.0 %                |
| TRANSFORMING_GROWTH_FACTOR_BETA1_PRODUCTION              | 14.3 %               | 0.0 %                |

**Supplementary Table 2. RNA sequencing analysis of the castration-resistant VCaP xenograft tumors in nude mice treated with enzalutamide.**

Table showing the mRNA expressions of markers for epithelial phenotype (*CDH1* and *KRT8*) and markers for mesenchymal phenotype (*VIM*, *CDH2*, *CDH11*, *ZEB1* and *ZEB2*). Serum PSA values are also presented.

| <b>Tumor_ID</b> | <b>Group</b> | <b>PSA</b> | <b>VIM</b> | <b>CDH1</b> | <b>CDH2</b> | <b>CDH11</b> | <b>ZEB1</b> | <b>ZEB2</b> | <b>KRT8</b> |
|-----------------|--------------|------------|------------|-------------|-------------|--------------|-------------|-------------|-------------|
| TU_15           | Response     | 2.81       | 0.00       | 308.25      | 0.00        | 0.00         | 0.00        | 0.00        | 94.70       |
| TU_16           | Response     | 1.42       | 0.07       | 314.83      | 0.00        | 0.00         | 0.00        | 0.00        | 179.62      |
| TU_31           | Response     | 4.91       | 0.00       | 266.93      | 0.14        | 0.00         | 0.00        | 0.00        | 100.63      |
| TU_63           | Response     | 3.98       | 0.00       | 279.73      | 0.08        | 0.00         | 0.00        | 0.00        | 95.84       |
| TU_78           | Response     | 4.50       | 0.00       | 390.27      | 0.23        | 0.00         | 0.68        | 0.00        | 109.40      |
| TU_113          | Response     | 5.48       | 0.00       | 358.91      | 0.00        | 0.00         | 0.25        | 0.00        | 185.69      |
| TU_114          | Response     | 8.49       | 0.00       | 243.41      | 0.36        | 0.07         | 0.44        | 0.00        | 120.15      |
| TU_115          | Response     | 1.42       | 0.00       | 318.10      | 0.28        | 0.00         | 0.21        | 0.00        | 106.43      |
| TU_117          | Response     | 0.94       | 0.00       | 344.64      | 0.00        | 0.00         | 0.08        | 0.00        | 115.77      |
| TU_131          | Response     | 2.76       | 0.00       | 341.61      | 0.11        | 0.00         | 0.22        | 0.00        | 120.33      |
| TU_19           | Resistance   | 11.53      | 0.00       | 384.39      | 0.17        | 0.00         | 0.00        | 0.00        | 127.12      |
| TU_45           | Resistance   | 8.33       | 0.00       | 275.33      | 0.18        | 0.00         | 0.00        | 0.00        | 126.85      |
| TU_55           | Resistance   | 26.94      | 0.00       | 331.24      | 0.00        | 0.00         | 0.20        | 0.00        | 105.27      |
| TU_73           | Resistance   | 38.24      | 0.00       | 380.48      | 0.71        | 0.00         | 0.10        | 0.00        | 98.83       |
| TU_75           | Resistance   | 4.87       | 0.00       | 394.25      | 0.00        | 0.00         | 0.15        | 0.00        | 117.81      |
| TU_86           | Resistance   | 14.82      | 0.00       | 308.73      | 0.11        | 0.00         | 0.00        | 0.00        | 130.30      |
| TU_120          | Resistance   | 15.64      | 0.00       | 420.23      | 0.00        | 0.00         | 0.22        | 0.00        | 145.03      |
| TU_135          | Resistance   | 19.81      | 0.00       | 323.45      | 0.19        | 0.00         | 0.37        | 0.00        | 96.16       |
| TU_140          | Resistance   | 23.19      | 0.00       | 388.41      | 0.22        | 0.00         | 0.11        | 0.11        | 91.27       |
| TU_141          | Resistance   | 38.39      | 0.00       | 343.86      | 0.11        | 0.00         | 0.11        | 0.00        | 128.06      |
